# Supplementary material for: Culturing Ancient Bacteria Carrying Resistance Genes from Permafrost and Comparative Genomics with Modern Isolates
Source: MDPI journal article supplement (doi:10.3390/microorganisms8101522), 2020-10-03
Supplement: s1 [file s1]

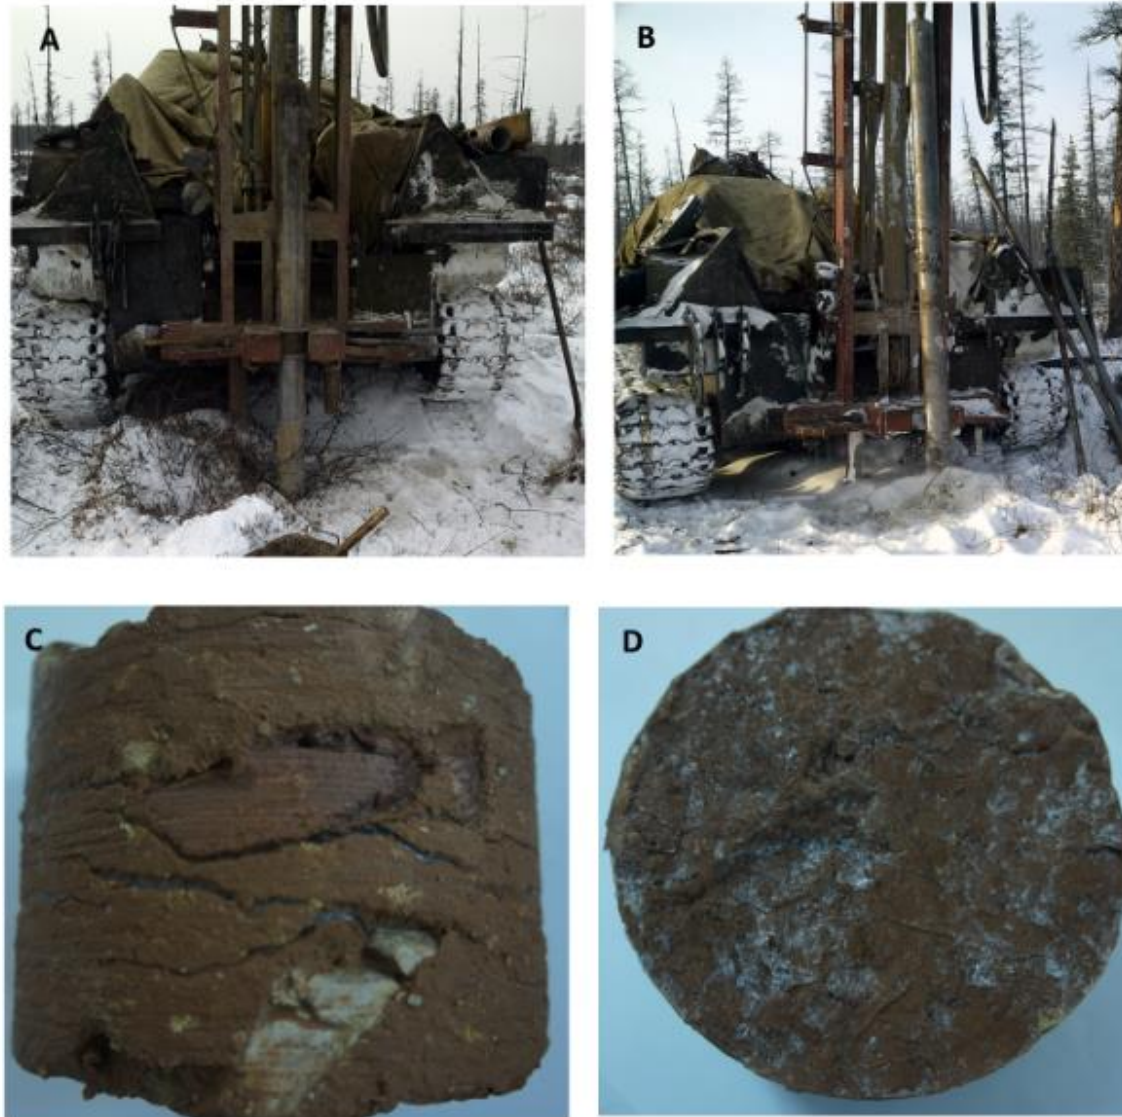

**Supplementary Figure 1.** Illustration of the permafrost collection process. A and B : core drill. C and D: permafrost specimen following shipment.

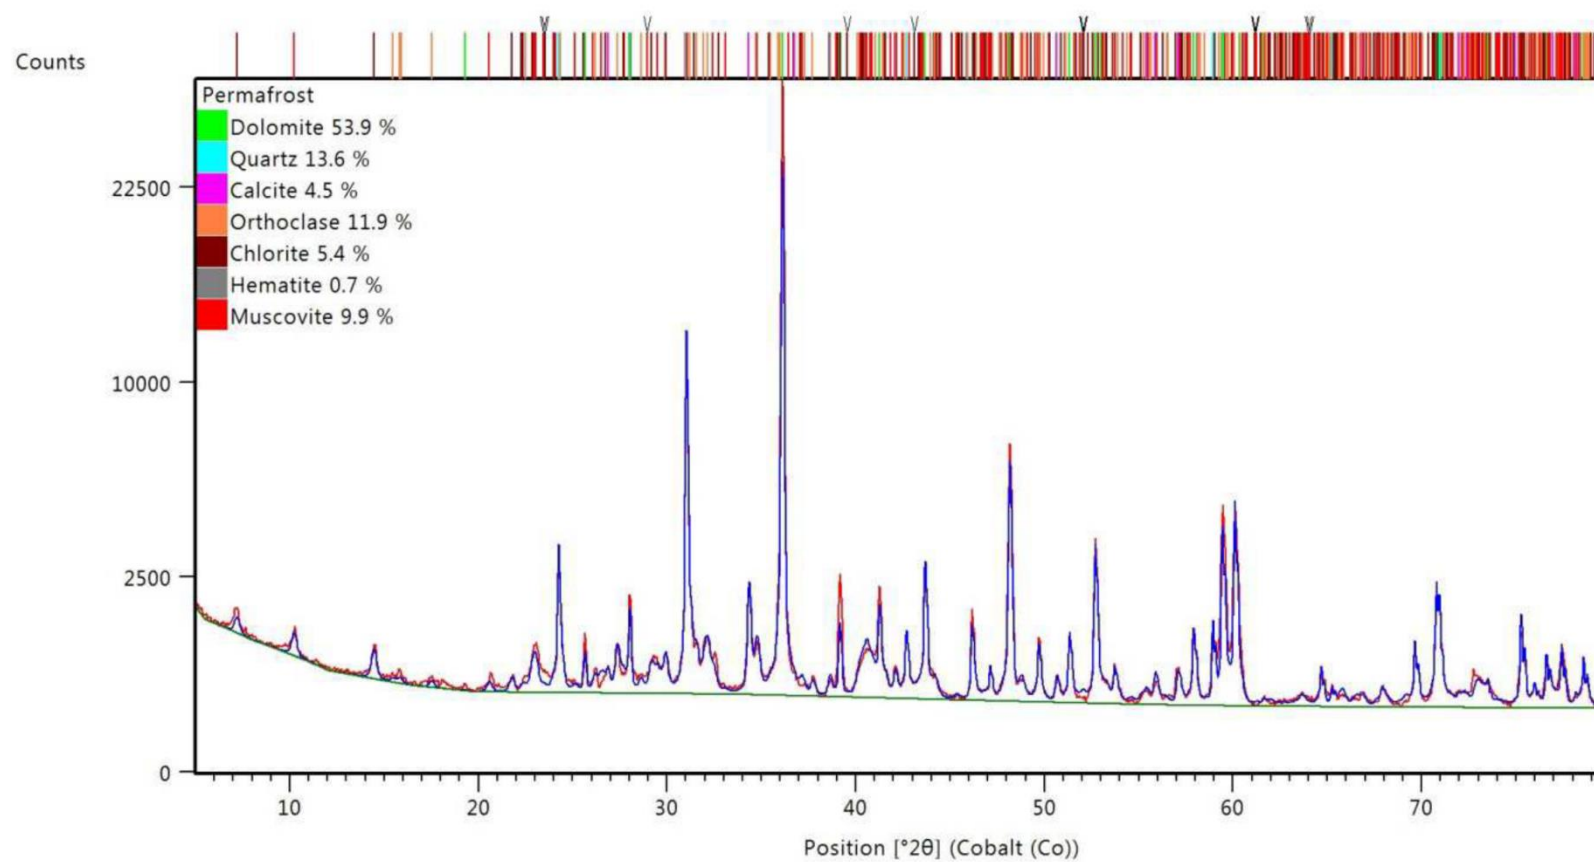

**Supplementary Figure 2.** Mineralogical analysis of the permafrost sample.

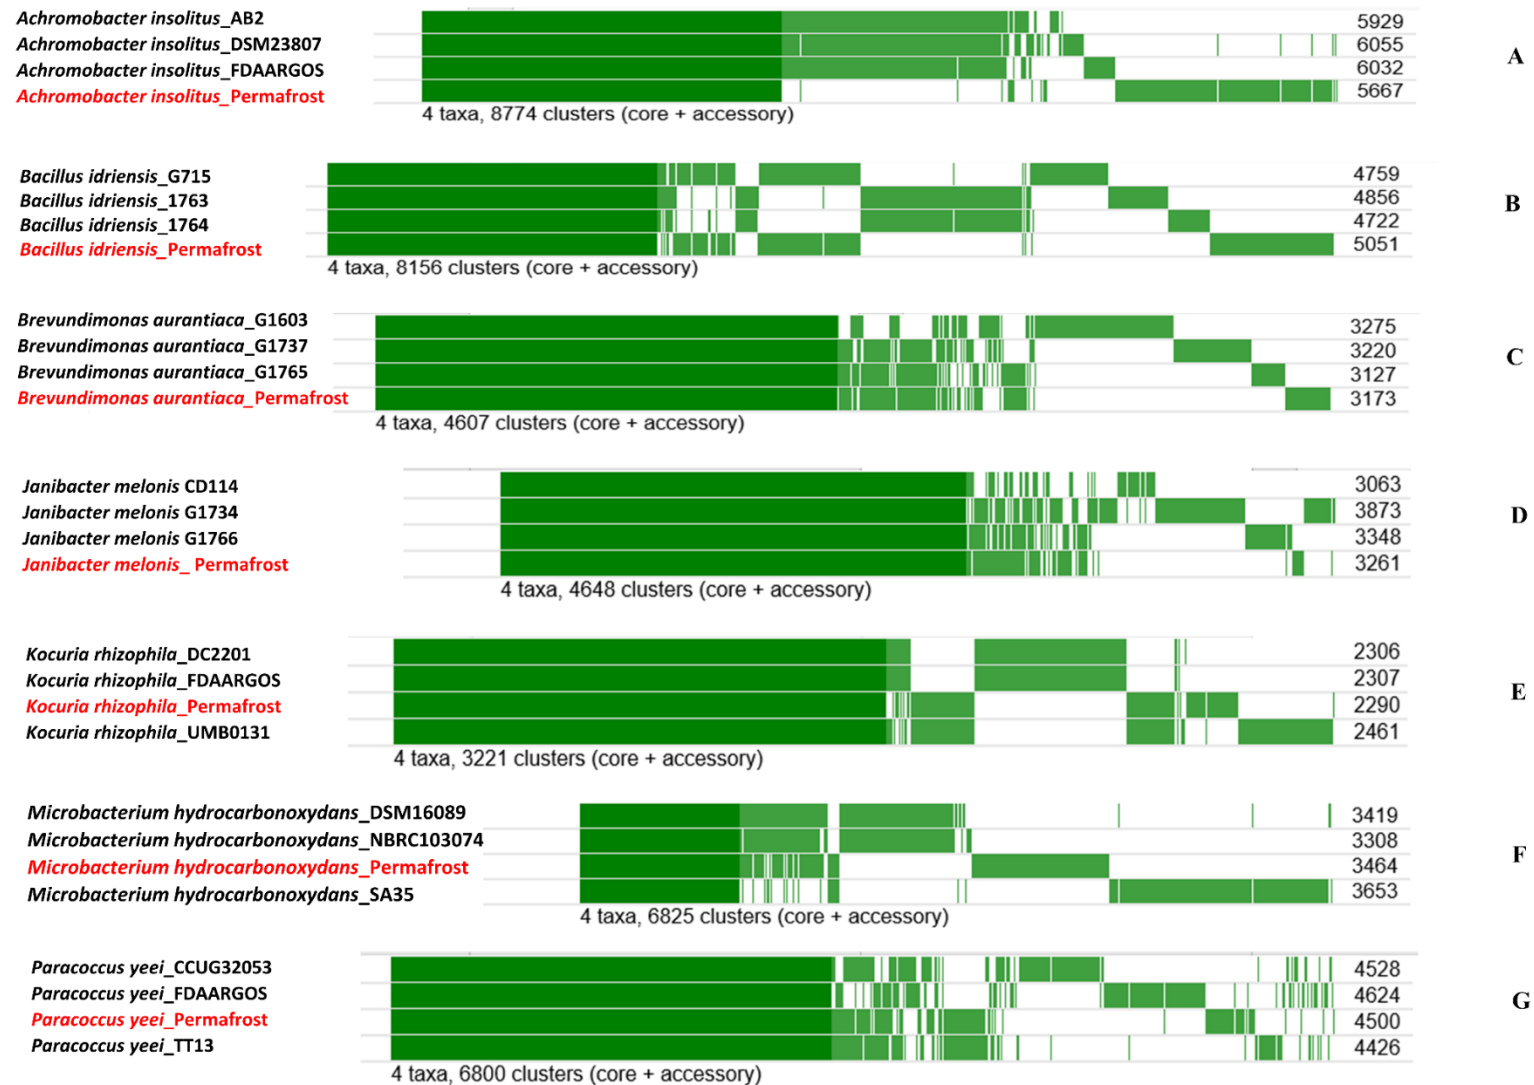

**Supplementary Figure 3.** Pan-genomes representing four strains of seven bacterial species: *Achromobacter insolitus* (A), *Bacillus idriensis* (B), *Brevundimonas aurantiaca* (C), *Janibacter melonis* (D), *Kocuria rhizophila* (E), *Microbacterium hydrocarbonoxydans* (F) and *Paracoccus yeei* (G). Isolated bacterial permafrost strains are in red and the other 3 strains represent the modern ones (non-permafrost). For each pan-genome the core is represented in dark green, and the genomic content related to the accessory genes and the unique genes are displayed in light green and white, respectively.

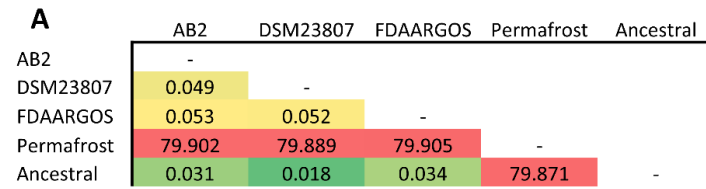

*Achromobacter insolitus*

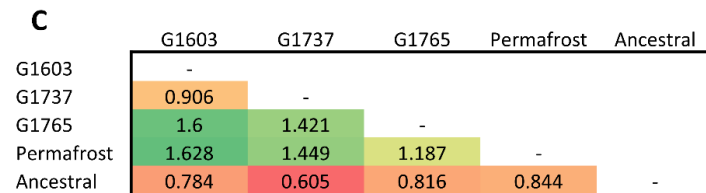

*Brevundimonas aurantiaca*

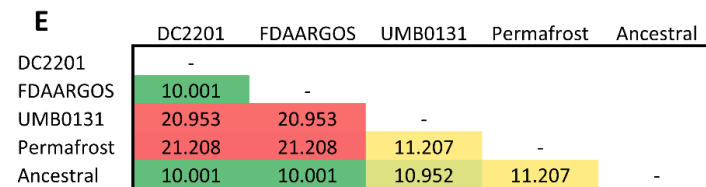

*Kocuria rhizophila*

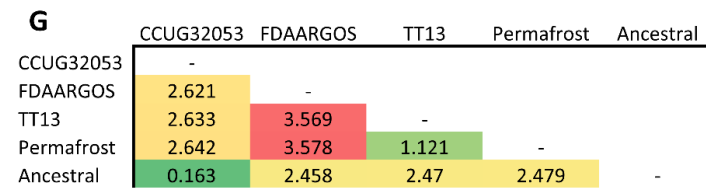

*Paracoccus yeei*

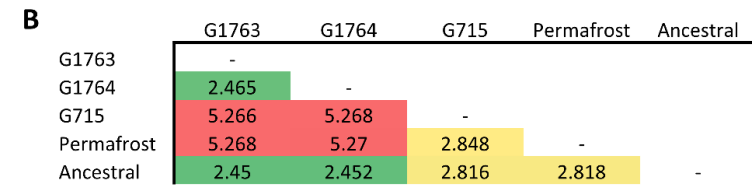

*Bacillus idriensis*

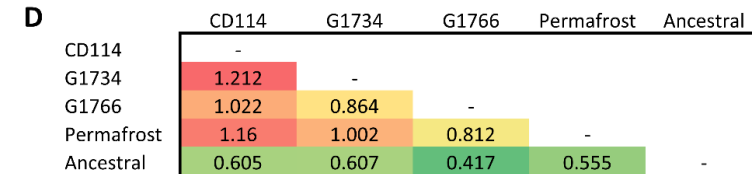

*Janibacter melonis*

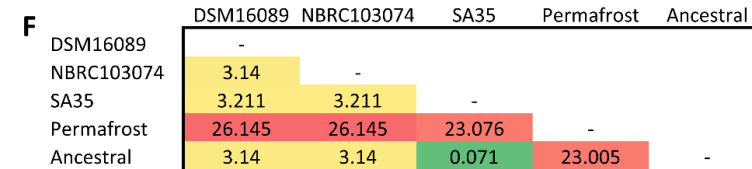

*Microbacterium hydrocarbonoxydans*

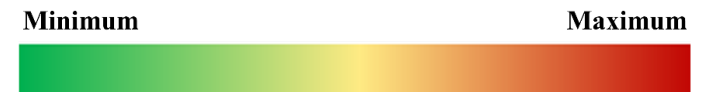

**Supplementary Figure 4.** Evolutionary distances of bacterial sequences relative to each other and relative to their ancestral sequences. The evolutionary distances are based on the length of branches of phylogenetic trees; these lengths were computed using the Maximum Composite Likelihood method [33] and are in units of the number of base substitutions per site. Green to red shows the lowest to highest SNPs. The column named ancestral represents ancestral sequences reconstructed with degenerated nucleotides by a python script. The column named "Permafrost" represents bacterial sequences from bacteria isolated from

permafrost; the others represent the modern non-permafrost sequences. *Achromobacter insolitus* (A), *Bacillus idriensis* (B), *Brevundimonas aurantiaca* (C), *Janibacter melonis* (D), *Kocuria rhizophila* (E), *Microbacterium hydrocarbonoxydans* (F) and *Paracoccus yeei* (G).

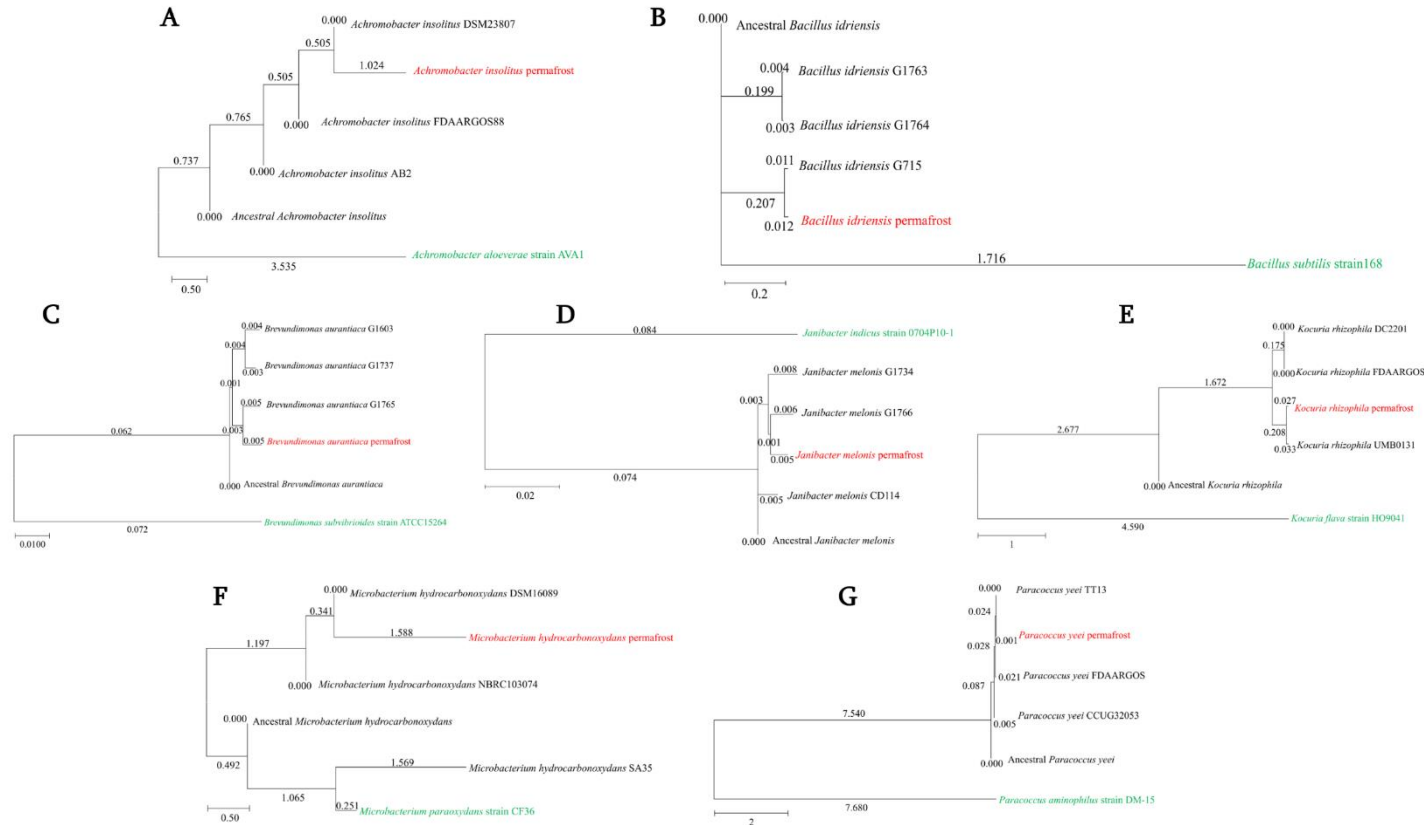

**Supplementary Figure 5.** Phylogenetic trees based on the SNP core genomes highlighting the position of permafrost species (set in red) compared to their modern equivalents and their ancestral sequences. The nearest cousin bacterial species (set in green) is used as an out-group. (A) *Achromobacter insolitus*, (B) *Bacillus idriensis*, (C) *Brevundimonas aurantiaca*, (D) *Janibacter melonis*, (E) *Kocuria rhizophila*, (F) *Microbacterium hydrocarbonoxydans* and (G) *Paracoccus yeei*. The evolutionary history was inferred using the Neighbor-Joining method [34]. The tree is drawn to scale, with branch lengths (next to the branches) in the same units as those of the evolutionary distances used to infer the phylogenetic tree. The evolutionary distances were computed using the Maximum Composite Likelihood method [33] and are in the units of the number of base substitutions per site. The analysis involved 6 nucleotide sequences. All positions containing gaps and missing data were eliminated. Evolutionary analyses were conducted in MEGAX [26].

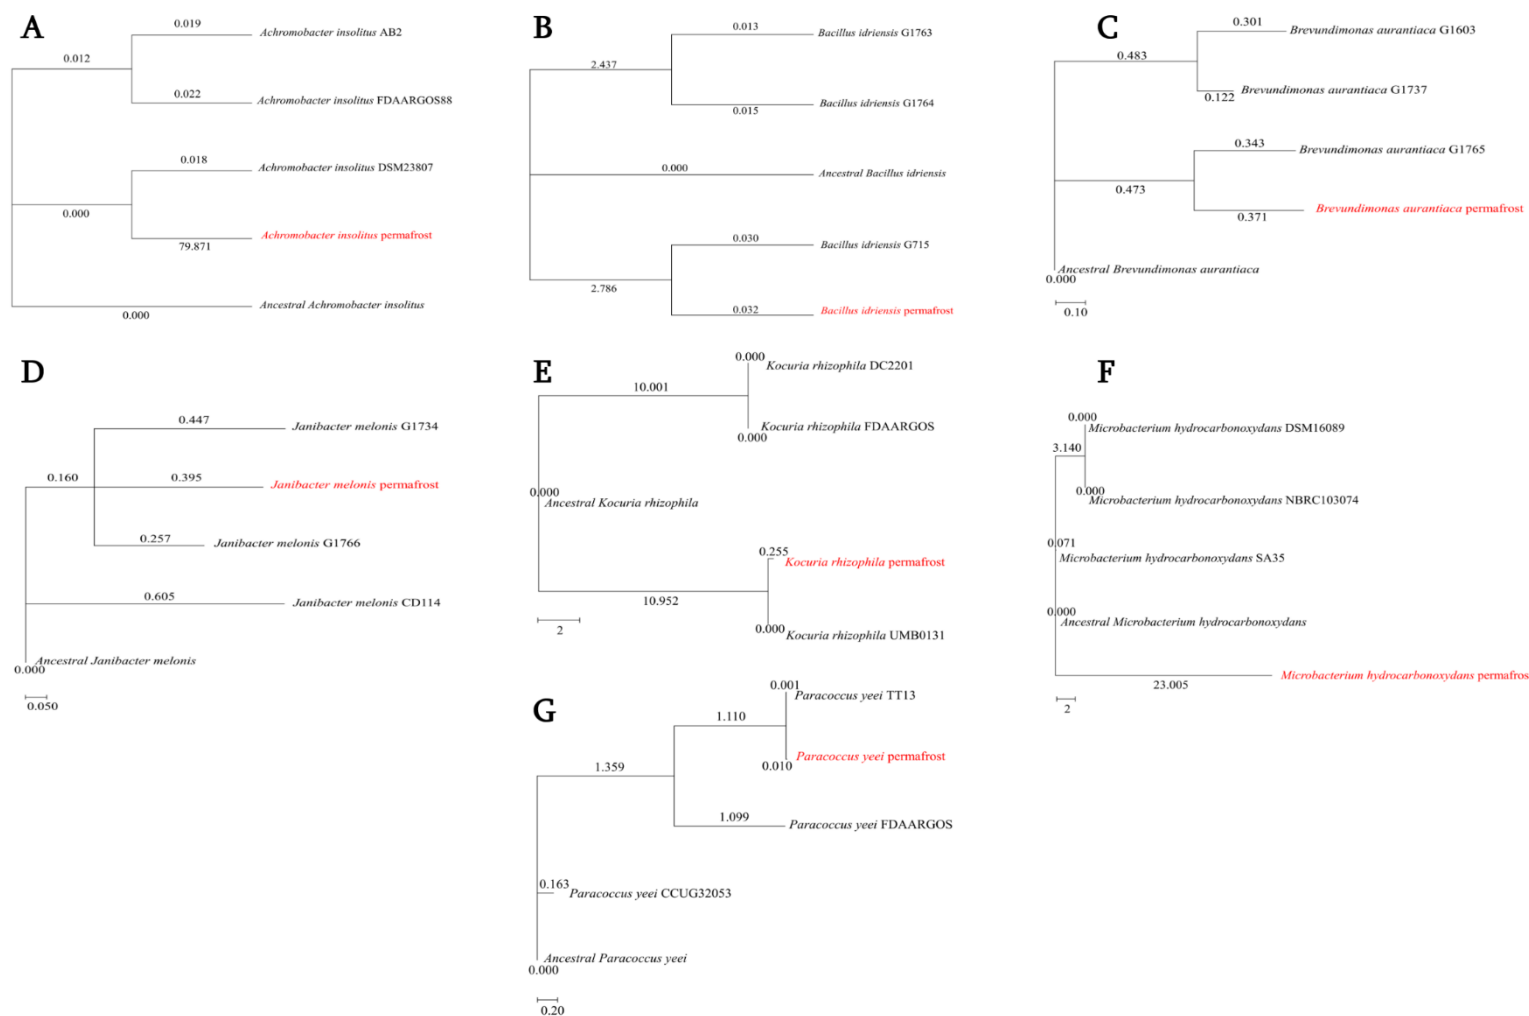

**Supplementary Figure 6.** Phylogenetic trees based on the SNP core genomes highlighting the position of strains of the same species compared to their ancestral sequences. Permafrost strains are displayed in red. (A) *Achromobacter insolitus* strains, (B) *Bacillus idriensis* strains, (C) *Brevundimonas aurantiaca* strains, (D) *Janibacter melonis* strains, (E) *Kocuria rhizophila* strains, (F) *Microbacterium hydrocarbonoxydans* strains and (G) *Paracoccus yeei* strains. The evolutionary history was inferred using the Neighbor-Joining method [34]. The tree is drawn to scale, with branch lengths (next to the branches) in the same units as those of the evolutionary distances used to infer the phylogenetic tree. The evolutionary distances were computed using the Maximum Composite Likelihood method [33]



and are in the units of the number of base substitutions per site. The analysis involved 6 nucleotide sequences. All positions containing gaps and missing data were eliminated. Evolutionary analyses were conducted in MEGAX [26].

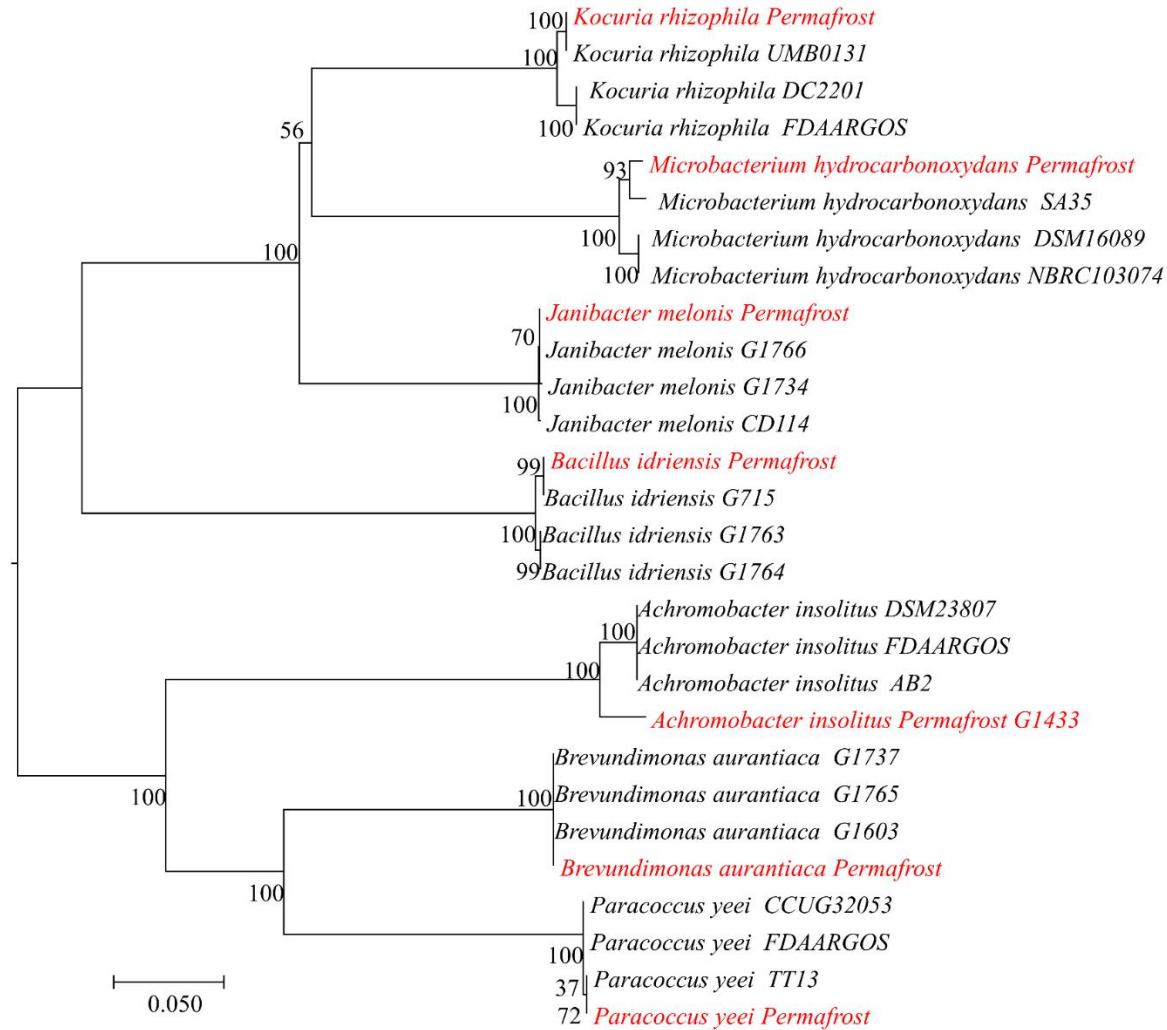

**Supplementary Figure 7.** Phylogenetic trees based on *rpoB* protein sequences of seven strains isolated from permafrost (in red) (*Achromobacter insolitus*, *Bacillus idriensis*, *Brevundimonas aurantiaca*, *Janibacter melonis*, *Kocuria rhizophila*, *Microbacterium hydrocarbonoxydans*, *Paracoccus yeei*) and three of the modern strains (in black) for each species. The evolutionary history was inferred using the Neighbor-Joining method. The optimal tree with the sum of branch length = 1.35628898 is shown. The percentage of replicate trees in which the associated taxa clustered together in the bootstrap test (1000 replicates) are shown next to the branches. The tree is drawn to scale, with branch lengths in the same units as those of the evolutionary distances used to infer the phylogenetic tree. The evolutionary distances were computed using the Poisson correction method and are in the units of the number of amino acid substitutions per site. The analysis involved 28 amino acid sequences. All positions containing gaps and missing data were eliminated. There were a total of 869 positions in the final dataset. Evolutionary analyses were conducted in MEGA7.

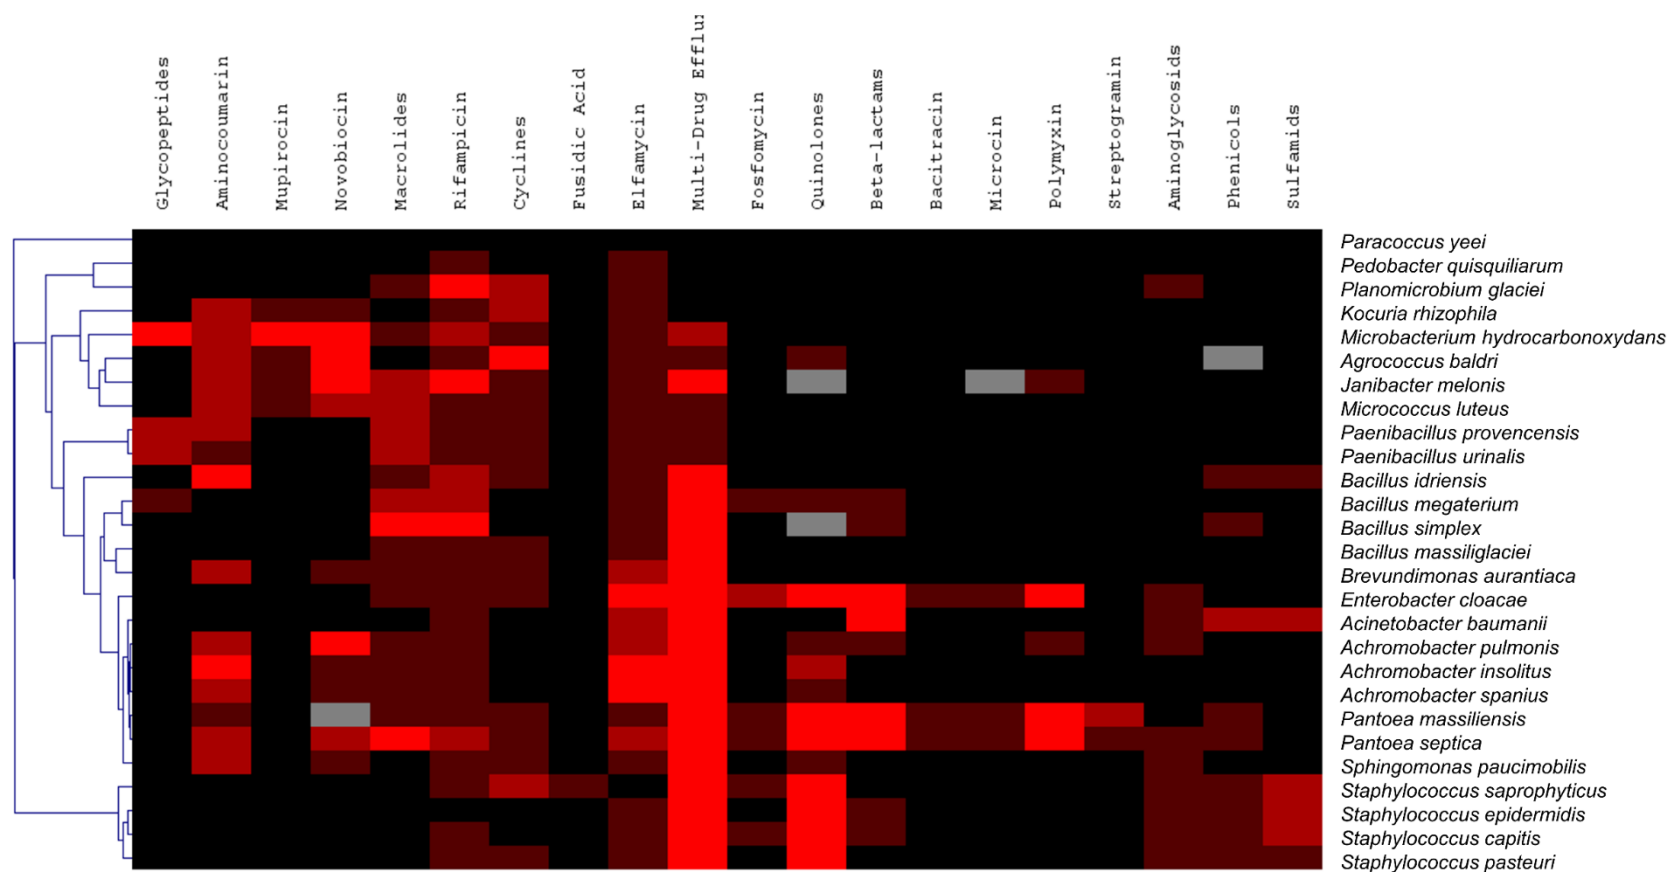

**Supplementary Figure 8.** Resistome of permafrost strains genome: BlastP analysis against ARG-ANNOT, CARD, and Resfinder Databases.
