# Supplementary material for: Culturing Ancient Bacteria Carrying Resistance Genes from Permafrost and Comparative Genomics with Modern Isolates
Source: Microorganisms. 2020 Oct 3;8(10):1522. doi: 10.3390/microorganisms8101522 (PMC7600834; doi:10.3390/microorganisms8101522)
Supplement: Supplementary file 1 [file microorganisms-08-01522-s001.zip › Supplementary Table S6.xls]

## Sheet: Resistome analysis
Bacterial name	START	END	%IDENTITY	%COVERAGE	DATABASE	ACCESSION	GENE	Antibiotic Class	Predicted function
Achromobacter insolitus G1433	1	96	91.67	3.01	card	NC_002516:2810009-2813198	MexF	Multi-Drug Resistance	MexF is the multidrug inner membrane transporter of the MexEF-OprN complex. mexF corresponds to 2 loci in Pseudomonas aeruginosa PAO1 (gene name: mexF/mexB) and 4 loci in Pseudomonas aeruginosa LESB58 (gene name: mexD/mexB).
	6	300	88.14	9.56	card	U97042:1264-4348	ceoB	Multi-Drug Resistance	ceoB is a cytoplasmic membrane component of the CeoAB-OpcM efflux pump
	1	93	87.1	3.01	card	U97042:1264-4348	ceoB	Multi-Drug Resistance	ceoB is a cytoplasmic membrane component of the CeoAB-OpcM efflux pump
	81	177	86.6	3.08	argannot	EU370913:47851-51003	(Flq)OqxBgb	Quinolones	(Flq)OqxBgb
	18	123	85.85	3.43	card	NC_002516:4707535-4710625	mexI	Multi-Drug Resistance	MexI is the inner membrane transporter of the efflux complex MexGHI-OpmD.
	24	126	83.5	8.63	card	X98831.1:362-1556	EF-Tu	Elfamycin	Sequence variants of Streptomyces cinnamoneus elongation factor Tu that confer resistance to elfamycin antibiotics.
	1	228	83.33	7.39	card	U97042:1264-4348	ceoB	Multi-Drug Resistance	ceoB is a cytoplasmic membrane component of the CeoAB-OpcM efflux pump
	4	167	82.32	7.32	card	U97042:1264-4348	ceoB	Multi-Drug Resistance	ceoB is a cytoplasmic membrane component of the CeoAB-OpcM efflux pump
	3	285	80.92	9.02	card	AFRQ01000061.1:23987-27125	AxyY	Multi-Drug Resistance	AxyY is the periplasmic adaptor protein of the AxyXY-OprZ efflux pump system in Achromobacter spp.
	45	164	80.83	3.88	card	NC_002516:4707535-4710625	mexI	Multi-Drug Resistance	MexI is the inner membrane transporter of the efflux complex MexGHI-OpmD.
	14	156	80.14	10.06	card	AJ252200:4494-5895	smeF	Multi-Drug Resistance	smeF is an outer membrane multidrug efflux protein of the smeDEF complex in Stenotrophomonas maltophilia
	29	311	79.5	9.04	card	NC_002516.2:2850883-2854015	MuxB	Multi-Drug Resistance	MuxB is one of the two necessary RND components in the Pseudomonas aeruginosa efflux pump system MuxABC-OpmB.
	109	246	78.99	9.22	card	NC_002516.2:2846283-2847780	OpmB	Multi-Drug Resistance	OpmB is an outer membrane efflux protein in Pseudomonas aeruginosa that shows functional cooperation with MuxABC to form the efflux pump system MuxABC-OpmB.
	1	416	78.85	13.48	card	U97042:1264-4348	ceoB	Multi-Drug Resistance	ceoB is a cytoplasmic membrane component of the CeoAB-OpcM efflux pump
	2	204	78.33	6.57	card	NC_002516:4707535-4710625	mexI	Multi-Drug Resistance	MexI is the inner membrane transporter of the efflux complex MexGHI-OpmD.
	1	585	78.29	18.96	card	U97042:1264-4348	ceoB	Multi-Drug Resistance	ceoB is a cytoplasmic membrane component of the CeoAB-OpcM efflux pump
	1	419	78.28	13.38	card	NC_002516.2:2850883-2854015	MuxB	Multi-Drug Resistance	MuxB is one of the two necessary RND components in the Pseudomonas aeruginosa efflux pump system MuxABC-OpmB.
	4	149	77.4	4.57	card	NC_006350.1:2147818-2150950	amrB	Multi-Drug Resistance	amrB is the membrane fusion protein of the AmrAB-OprM multidrug efflux complex.
	1	216	77.06	6.83	card	NC_002516.2:2850883-2854015	MuxB	Multi-Drug Resistance	MuxB is one of the two necessary RND components in the Pseudomonas aeruginosa efflux pump system MuxABC-OpmB.
	1544	1760	76.96	11.21	card	AY768532:1-1936	macB	Macrolides	MacB is an ATP-binding cassette (ABC) transporter that exports macrolides with 14- or 15- membered lactones. It forms an antibiotic efflux complex with MacA and TolC. macB corresponds to 1 locus in Pseudomonas aeruginosa PAO1 and 1 locus in Pseudomonas aeruginosa LESB58.
	3	143	76.76	4.53	card	NC_002516:4707535-4710625	mexI	Multi-Drug Resistance	MexI is the inner membrane transporter of the efflux complex MexGHI-OpmD.
	10	147	76.43	10.62	card	NC_002516.2:2854011-2855292	MuxA	Multi-Drug Resistance	MuxA is a membrane fusion protein component of the efflux pump system MuxABC-OpmB in Pseudomonas aeruginosa.
	1	845	75.97	27.21	card	NC_002516:4707535-4710625	mexI	Multi-Drug Resistance	MexI is the inner membrane transporter of the efflux complex MexGHI-OpmD.
	1	3074	75.31	97.2	card	L11616:1570-4711	MexB	Multi-Drug Resistance	MexB is the inner membrane multidrug exporter of the efflux complex MexAB-OprM.
	10	182	74.71	8.1	card	AF235050.4:38029-40141	parY	Aminocoumarin	point mutation on the Streptomyces rishiriensis parY resulting in aminocoumarin resistance
	171	1118	74.06	76.7	card	U97042:1-1219	ceoA	Multi-Drug Resistance	ceoA is a periplasmic linker subunit of the CeoAB-OpcM efflux pump
	6	190	74.05	7.95	card	NC_002516.2:2847776-2850887	MuxC	Multi-Drug Resistance	MuxC is one of the two necessary RND components of the MuxABC-OpmB efflux pumps system in Pseudomonas aeruginosa.
	1	507	73.73	42.13	card	X98831.1:362-1556	EF-Tu	Elfamycin	Sequence variants of Streptomyces cinnamoneus elongation factor Tu that confer resistance to elfamycin antibiotics.
	47	383	73.37	23.03	card	NC_002516:476333-477791	OprM	Multi-Drug Resistance	OprM is an outer membrane factor protein found in Pseudomonas aeruginosa and Burkholderia vietnamiensis. It is part of the MexAB-OprM MexVW-OprM MexXY-OprM and the AmrAB-OprM complex.
	1	2760	73.32	87.55	card	NC_002516.2:2850883-2854015	MuxB	Multi-Drug Resistance	MuxB is one of the two necessary RND components in the Pseudomonas aeruginosa efflux pump system MuxABC-OpmB.
	163	381	73.18	31.11	card	AF173226:352-1042	smeR	Multi-Drug Resistance	smeR is the responder component of a two component signal transduction system that includes smeS
	1021	1230	72.86	6.66	argannot	EU370913:47851-51003	(Flq)OqxBgb	Quinolones	(Flq)OqxBgb
	1	368	72.7	11.76	card	NC_002516.2:2847776-2850887	MuxC	Multi-Drug Resistance	MuxC is one of the two necessary RND components of the MuxABC-OpmB efflux pumps system in Pseudomonas aeruginosa.
	387	663	72.2	23.36	card	AJ252200:82-1267	smeD	Multi-Drug Resistance	smeD is the membrane fusion protein of the smeDEF multidrug efflux complex in Stenotrophomonas maltophilia
	1218	1410	72.02	9.14	card	AF235050.4:38029-40141	parY	Aminocoumarin	point mutation on the Streptomyces rishiriensis parY resulting in aminocoumarin resistance
	923	1436	71.62	16.27	card	NC_002516:4707535-4710625	mexI	Multi-Drug Resistance	MexI is the inner membrane transporter of the efflux complex MexGHI-OpmD.
	145	854	71.05	22.47	card	AFRQ01000061.1:23987-27125	AxyY	Multi-Drug Resistance	AxyY is the periplasmic adaptor protein of the AxyXY-OprZ efflux pump system in Achromobacter spp.
	711	1041	70.69	28.66	card	NC_003112.2:329613-330768	farA	Multi-Drug Resistance	farA is the membrane fusion protein that is part of the farAB efflux pump.
	2	611	70.28	19.32	card	NC_002516.2:2847776-2850887	MuxC	Multi-Drug Resistance	MuxC is one of the two necessary RND components of the MuxABC-OpmB efflux pumps system in Pseudomonas aeruginosa.
	181	426	70.28	34.88	card	AF173226:352-1042	smeR	Multi-Drug Resistance	smeR is the responder component of a two component signal transduction system that includes smeS
	50	407	70.14	11.4	card	AE004091.2:4116188-4119266	mexK	Multi-Drug Resistance	mexK is the inner membrane resistance-nodulation-cell division (RND) transporter in the MexJK multidrug efflux protein.
	1	909	69.97	75.04	card	X98831.1:362-1556	EF-Tu	Elfamycin	Sequence variants of Streptomyces cinnamoneus elongation factor Tu that confer resistance to elfamycin antibiotics.
	245	583	69.62	23.53	card	U57969:4623-6063	OprJ	Multi-Drug Resistance	OprJ is the outer membrane channel component of the MexCD-OprJ multidrug efflux complex.
	1	573	69.59	44.03	card	NC_002516.2:2854011-2855292	MuxA	Multi-Drug Resistance	MuxA is a membrane fusion protein component of the efflux pump system MuxABC-OpmB in Pseudomonas aeruginosa.
	97	1146	69.31	86.38	card	NC_002516:472024-473176	MexA	Multi-Drug Resistance	MexA is the membrane fusion protein of the MexAB-OprM multidrug efflux complex.
	31	516	69.26	31.43	card	U00096:2812616-2814155	emrB	Multi-Drug Resistance	emrB is a translocase in the emrB -TolC efflux protein in E. coli. It recognizes substrates including carbonyl cyanide m-chlorophenylhydrazone (CCCP) nalidixic acid and thioloactomycin.
	27	869	68.79	54.49	card	U38944.1:1-1537	opcM	Multi-Drug Resistance	OpcM is an outer membrane factor protein found in Burkholderia cepacia. It is part of the CeoAB-OpcM complex.
	1	303	68.77	13.68	card	AF235050.4:38029-40141	parY	Aminocoumarin	point mutation on the Streptomyces rishiriensis parY resulting in aminocoumarin resistance
	1238	1754	68.64	27.64	card	AF170880:1-1849	novA	Novobiocin	A type III ABC transporter identified on the novobiocin biosynthetic gene cluster involved in the transport and resistance of novobiocin.
	1489	2678	68.07	33.97	card	NC_000913.3:1170518-1173965	mfd	Multi-Drug Resistance	mfd dissociates transcription elongation complexes blocked at nonpairing lesions and mediates recruitment of DNA repair proteins. The Mfd (mutation frequency decline) protein also known as transcription-repair coupling factor is responsible for ATP-dependent removal of stalled RNA polymerase from DNA lesions by inducing forward movement of the RNA polymerase and subsequent recruitment of nucleoti…
Achromobacter pulmonis G1574	46	392	70.36	15.77	card	AF235050.4:38029-40141	parY	Aminocoumarin	point mutation on the Streptomyces rishiriensis parY resulting in aminocoumarin resistance
	1218	1410	72.02	9.14	card	AF235050.4:38029-40141	parY	Aminocoumarin	point mutation on the Streptomyces rishiriensis parY resulting in aminocoumarin resistance
	356	695	69.14	40.89	argannot	X90856:388-1194	(AGly)Aph3-IIb	Aminoglycosids	(AGly)Aph3-IIb
	152	909	67.23	65.7	card	AY524276:1-1138	SRT-2	Beta-lactams	SRT-2 isolated from Serratia marcescens is a chromosomal beta-lactamase that confers resistance to cefotaxime
	236	1419	72.86	98.07	card	X98831.1:362-1556	EF-Tu	Elfamycin	Sequence variants of Streptomyces cinnamoneus elongation factor Tu that confer resistance to elfamycin antibiotics.
	8	1182	73.24	97.32	card	X98831.1:362-1556	EF-Tu	Elfamycin	Sequence variants of Streptomyces cinnamoneus elongation factor Tu that confer resistance to elfamycin antibiotics.
	1544	1760	76.96	11.21	card	AY768532:1-1936	macB	Macrolides	MacB is an ATP-binding cassette (ABC) transporter that exports macrolides with 14- or 15- membered lactones. It forms an antibiotic efflux complex with MacA and TolC. macB corresponds to 1 locus in Pseudomonas aeruginosa PAO1 and 1 locus in Pseudomonas aeruginosa LESB58.
	2388	3053	70.1	20.75	card	NC_006350.1:2147818-2150950	amrB	Multi-Drug Resistance	amrB is the membrane fusion protein of the AmrAB-OprM multidrug efflux complex.
	2356	3065	71.05	22.47	card	AFRQ01000061.1:23987-27125	AxyY	Multi-Drug Resistance	AxyY is the periplasmic adaptor protein of the AxyXY-OprZ efflux pump system in Achromobacter spp.
	171	1118	74.06	76.7	card	U97042:1-1219	ceoA	Multi-Drug Resistance	ceoA is a periplasmic linker subunit of the CeoAB-OpcM efflux pump
	1	3081	80.24	99.68	card	U97042:1264-4348	ceoB	Multi-Drug Resistance	ceoB is a cytoplasmic membrane component of the CeoAB-OpcM efflux pump
	169	635	67.85	66.67	card	LT673656.1:1884345-1885023	CpxR	Multi-Drug Resistance	CpxR is directly involved in activation of expression of RND efflux pump MexAB-OprM in P. aeruginosa. CpxR is required to enhance mexAB-oprM expression and drug resistance in the absence of repressor MexR.
	106	591	69.26	31.43	card	U00096:2812616-2814155	emrB	Multi-Drug Resistance	emrB is a translocase in the emrB -TolC efflux protein in E. coli. It recognizes substrates including carbonyl cyanide m-chlorophenylhydrazone (CCCP) nalidixic acid and thioloactomycin.
	711	1041	70.69	28.66	card	NC_003112.2:329613-330768	farA	Multi-Drug Resistance	farA is the membrane fusion protein that is part of the farAB efflux pump.
	164	530	66.84	23.56	card	U40487.1:171-1686	lrfA	Multi-Drug Resistance	lfrA is involved in the active efflux of quinolones and is found in Mycobacterium smegmatis. lfrA corresponds to 2 loci in Pseudomonas aeruginosa PAO1 and 2 loci in Pseudomonas aeruginosa LESB58.
	76	1125	69.31	86.38	card	NC_002516:472024-473176	MexA	Multi-Drug Resistance	MexA is the membrane fusion protein of the MexAB-OprM multidrug efflux complex.
	1	3074	75.31	97.2	card	L11616:1570-4711	MexB	Multi-Drug Resistance	MexB is the inner membrane multidrug exporter of the efflux complex MexAB-OprM.
	112	1080	72.7	82.4	card	U57969:295-1459	MexC	Multi-Drug Resistance	MexC is the membrane fusion protein of the MexCD-OprJ multidrug efflux complex.
	1	3100	73.96	98.5	card	U57969:1486-4618	MexD	Multi-Drug Resistance	MexD is the multidrug inner membrane transporter of the MexCD-OprJ complex.
	1	3068	74.19	98.61	card	NC_002516:4707535-4710625	mexI	Multi-Drug Resistance	MexI is the inner membrane transporter of the efflux complex MexGHI-OpmD.
	923	1477	72.06	17.6	card	NC_002516:4707535-4710625	mexI	Multi-Drug Resistance	MexI is the inner membrane transporter of the efflux complex MexGHI-OpmD.
	82	509	69.5	13.65	card	AE004091.2:4116188-4119266	mexK	Multi-Drug Resistance	mexK is the inner membrane resistance-nodulation-cell division (RND) transporter in the MexJK multidrug efflux protein.
	1171	1488	68.87	10.33	card	AE004091.2:4116188-4119266	mexK	Multi-Drug Resistance	mexK is the inner membrane resistance-nodulation-cell division (RND) transporter in the MexJK multidrug efflux protein.
	1747	2936	68.07	33.97	card	NC_000913.3:1170518-1173965	mfd	Multi-Drug Resistance	mfd dissociates transcription elongation complexes blocked at nonpairing lesions and mediates recruitment of DNA repair proteins. The Mfd (mutation frequency decline) protein also known as transcription-repair coupling factor is responsible for ATP-dependent removal of stalled RNA polymerase from DNA lesions by inducing forward movement of the RNA polymerase and subsequent recruitment of nucleoti…
	191	933	71.35	57.14	card	NC_002516.2:2854011-2855292	MuxA	Multi-Drug Resistance	MuxA is a membrane fusion protein component of the efflux pump system MuxABC-OpmB in Pseudomonas aeruginosa.
	1	3025	70.7	95.75	card	NC_002516.2:2850883-2854015	MuxB	Multi-Drug Resistance	MuxB is one of the two necessary RND components in the Pseudomonas aeruginosa efflux pump system MuxABC-OpmB.
	2	3066	73.91	97.29	card	NC_002516.2:2850883-2854015	MuxB	Multi-Drug Resistance	MuxB is one of the two necessary RND components in the Pseudomonas aeruginosa efflux pump system MuxABC-OpmB.
	21	3034	66.44	95.02	card	NC_002516.2:2847776-2850887	MuxC	Multi-Drug Resistance	MuxC is one of the two necessary RND components of the MuxABC-OpmB efflux pumps system in Pseudomonas aeruginosa.
	29	1355	67.81	85.03	card	U38944.1:1-1537	opcM	Multi-Drug Resistance	OpcM is an outer membrane factor protein found in Burkholderia cepacia. It is part of the CeoAB-OpcM complex.
	73	1439	67.35	89.71	card	NC_002516.2:2846283-2847780	OpmB	Multi-Drug Resistance	OpmB is an outer membrane efflux protein in Pseudomonas aeruginosa that shows functional cooperation with MuxABC to form the efflux pump system MuxABC-OpmB.
	905	1243	69.62	23.53	card	U57969:4623-6063	OprJ	Multi-Drug Resistance	OprJ is the outer membrane channel component of the MexCD-OprJ multidrug efflux complex.
	63	1401	69.76	91.53	card	U57969:4623-6063	OprJ	Multi-Drug Resistance	OprJ is the outer membrane channel component of the MexCD-OprJ multidrug efflux complex.
	49	1429	70.42	91.71	card	NC_002516:476333-477791	OprM	Multi-Drug Resistance	OprM is an outer membrane factor protein found in Pseudomonas aeruginosa and Burkholderia vietnamiensis. It is part of the MexAB-OprM MexVW-OprM MexXY-OprM and the AmrAB-OprM complex.
	285	1079	66.58	64.92	card	AJ252200:82-1267	smeD	Multi-Drug Resistance	smeD is the membrane fusion protein of the smeDEF multidrug efflux complex in Stenotrophomonas maltophilia
	163	381	73.18	31.11	card	AF173226:352-1042	smeR	Multi-Drug Resistance	smeR is the responder component of a two component signal transduction system that includes smeS
	147	369	72.77	31.26	card	AF173226:352-1042	smeR	Multi-Drug Resistance	smeR is the responder component of a two component signal transduction system that includes smeS
	181	426	70.28	34.88	card	AF173226:352-1042	smeR	Multi-Drug Resistance	smeR is the responder component of a two component signal transduction system that includes smeS
	1298	1814	68.64	27.64	card	AF170880:1-1849	novA	Novobiocin	A type III ABC transporter identified on the novobiocin biosynthetic gene cluster involved in the transport and resistance of novobiocin.
	1033	1734	65.39	37.86	card	AF170880:1-1849	novA	Novobiocin	A type III ABC transporter identified on the novobiocin biosynthetic gene cluster involved in the transport and resistance of novobiocin.
	1267	1679	66.99	22.23	card	AF170880:1-1849	novA	Novobiocin	A type III ABC transporter identified on the novobiocin biosynthetic gene cluster involved in the transport and resistance of novobiocin.
	628	1040	68.52	33.47	card	U46859:24295-25528	rosA	Polymyxin	rosA is part of an efflux pump/potassium antiporter system (RosAB) in Yersinia that confers resistance to cationic antimicrobial peptides such as polymyxin B.
	1021	1230	72.86	6.66	argannot	EU370913:47851-51003	(Flq)OqxBgb	Quinolones	(Flq)OqxBgb
Achromobacter spanius	90	282	72.02	9.14	card	AF235050.4:38029-40141	parY	Aminocoumarin	point mutation on the Streptomyces rishiriensis parY resulting in aminocoumarin resistance
	127	473	70.36	15.77	card	AF235050.4:38029-40141	parY	Aminocoumarin	point mutation on the Streptomyces rishiriensis parY resulting in aminocoumarin resistance
	1	150	78.67	12.56	card	X98831.1:362-1556	EF-Tu	Elfamycin	Sequence variants of Streptomyces cinnamoneus elongation factor Tu that confer resistance to elfamycin antibiotics.
	1	909	71.6	75.04	card	X98831.1:362-1556	EF-Tu	Elfamycin	Sequence variants of Streptomyces cinnamoneus elongation factor Tu that confer resistance to elfamycin antibiotics.
	3	261	76.83	21.69	card	X98831.1:362-1556	EF-Tu	Elfamycin	Sequence variants of Streptomyces cinnamoneus elongation factor Tu that confer resistance to elfamycin antibiotics.
	1	423	72.53	34.67	card	X98831.1:362-1556	EF-Tu	Elfamycin	Sequence variants of Streptomyces cinnamoneus elongation factor Tu that confer resistance to elfamycin antibiotics.
	1544	1760	76.96	11.21	card	AY768532:1-1936	macB	Macrolides	MacB is an ATP-binding cassette (ABC) transporter that exports macrolides with 14- or 15- membered lactones. It forms an antibiotic efflux complex with MacA and TolC. macB corresponds to 1 locus in Pseudomonas aeruginosa PAO1 and 1 locus in Pseudomonas aeruginosa LESB58.
	27	471	70	14.02	card	AFRQ01000061.1:23987-27125	AxyY	Multi-Drug Resistance	AxyY is the periplasmic adaptor protein of the AxyXY-OprZ efflux pump system in Achromobacter spp.
	2356	3065	71.05	22.47	card	AFRQ01000061.1:23987-27125	AxyY	Multi-Drug Resistance	AxyY is the periplasmic adaptor protein of the AxyXY-OprZ efflux pump system in Achromobacter spp.
	171	1118	74.06	76.7	card	U97042:1-1219	ceoA	Multi-Drug Resistance	ceoA is a periplasmic linker subunit of the CeoAB-OpcM efflux pump
	85	3165	80.24	99.68	card	U97042:1264-4348	ceoB	Multi-Drug Resistance	ceoB is a cytoplasmic membrane component of the CeoAB-OpcM efflux pump
	100	566	67.85	66.67	card	LT673656.1:1884345-1885023	CpxR	Multi-Drug Resistance	CpxR is directly involved in activation of expression of RND efflux pump MexAB-OprM in P. aeruginosa. CpxR is required to enhance mexAB-oprM expression and drug resistance in the absence of repressor MexR.
	106	591	69.26	31.43	card	U00096:2812616-2814155	emrB	Multi-Drug Resistance	emrB is a translocase in the emrB -TolC efflux protein in E. coli. It recognizes substrates including carbonyl cyanide m-chlorophenylhydrazone (CCCP) nalidixic acid and thioloactomycin.
	567	897	70.69	28.66	card	NC_003112.2:329613-330768	farA	Multi-Drug Resistance	farA is the membrane fusion protein that is part of the farAB efflux pump.
	164	530	67.11	23.56	card	U40487.1:171-1686	lrfA	Multi-Drug Resistance	lfrA is involved in the active efflux of quinolones and is found in Mycobacterium smegmatis. lfrA corresponds to 2 loci in Pseudomonas aeruginosa PAO1 and 2 loci in Pseudomonas aeruginosa LESB58.
	85	1134	69.31	86.38	card	NC_002516:472024-473176	MexA	Multi-Drug Resistance	MexA is the membrane fusion protein of the MexAB-OprM multidrug efflux complex.
	52	3125	75.31	97.2	card	L11616:1570-4711	MexB	Multi-Drug Resistance	MexB is the inner membrane multidrug exporter of the efflux complex MexAB-OprM.
	58	525	74.84	39.74	card	U57969:295-1459	MexC	Multi-Drug Resistance	MexC is the membrane fusion protein of the MexCD-OprJ multidrug efflux complex.
	10	218	74.06	17.68	card	U57969:295-1459	MexC	Multi-Drug Resistance	MexC is the membrane fusion protein of the MexCD-OprJ multidrug efflux complex.
	1	501	78.04	15.99	card	U57969:1486-4618	MexD	Multi-Drug Resistance	MexD is the multidrug inner membrane transporter of the MexCD-OprJ complex.
	3	104	87.25	3.26	card	U57969:1486-4618	MexD	Multi-Drug Resistance	MexD is the multidrug inner membrane transporter of the MexCD-OprJ complex.
	1	288	85.76	9.19	card	U57969:1486-4618	MexD	Multi-Drug Resistance	MexD is the multidrug inner membrane transporter of the MexCD-OprJ complex.
	5	279	77.54	8.75	card	U57969:1486-4618	MexD	Multi-Drug Resistance	MexD is the multidrug inner membrane transporter of the MexCD-OprJ complex.
	4	129	84.13	4.02	card	U57969:1486-4618	MexD	Multi-Drug Resistance	MexD is the multidrug inner membrane transporter of the MexCD-OprJ complex.
	3	276	74.18	8.56	card	NC_002516:2810009-2813198	MexF	Multi-Drug Resistance	MexF is the multidrug inner membrane transporter of the MexEF-OprN complex. mexF corresponds to 2 loci in Pseudomonas aeruginosa PAO1 (gene name: mexF/mexB) and 4 loci in Pseudomonas aeruginosa LESB58 (gene name: mexD/mexB).
	1	3068	74.25	98.61	card	NC_002516:4707535-4710625	mexI	Multi-Drug Resistance	MexI is the inner membrane transporter of the efflux complex MexGHI-OpmD.
	50	407	70.14	11.4	card	AE004091.2:4116188-4119266	mexK	Multi-Drug Resistance	mexK is the inner membrane resistance-nodulation-cell division (RND) transporter in the MexJK multidrug efflux protein.
	57	304	72.18	8.11	card	NC_002516.2:4904647-4907704	mexW	Multi-Drug Resistance	MexW is the RND-type membrane protein of the efflux complex MexVW-OprM.
	25	201	75.14	7.76	card	NC_002516.2:4904647-4907704	mexW	Multi-Drug Resistance	MexW is the RND-type membrane protein of the efflux complex MexVW-OprM.
	1789	2978	68.07	33.97	card	NC_000913.3:1170518-1173965	mfd	Multi-Drug Resistance	mfd dissociates transcription elongation complexes blocked at nonpairing lesions and mediates recruitment of DNA repair proteins. The Mfd (mutation frequency decline) protein also known as transcription-repair coupling factor is responsible for ATP-dependent removal of stalled RNA polymerase from DNA lesions by inducing forward movement of the RNA polymerase and subsequent recruitment of nucleoti…
	80	822	71.35	57.14	card	NC_002516.2:2854011-2855292	MuxA	Multi-Drug Resistance	MuxA is a membrane fusion protein component of the efflux pump system MuxABC-OpmB in Pseudomonas aeruginosa.
	1	3025	70.7	95.75	card	NC_002516.2:2850883-2854015	MuxB	Multi-Drug Resistance	MuxB is one of the two necessary RND components in the Pseudomonas aeruginosa efflux pump system MuxABC-OpmB.
	2	3066	73.91	97.29	card	NC_002516.2:2850883-2854015	MuxB	Multi-Drug Resistance	MuxB is one of the two necessary RND components in the Pseudomonas aeruginosa efflux pump system MuxABC-OpmB.
	32	342	71.06	10	card	NC_002516.2:2847776-2850887	MuxC	Multi-Drug Resistance	MuxC is one of the two necessary RND components of the MuxABC-OpmB efflux pumps system in Pseudomonas aeruginosa.
	2	611	70.28	19.32	card	NC_002516.2:2847776-2850887	MuxC	Multi-Drug Resistance	MuxC is one of the two necessary RND components of the MuxABC-OpmB efflux pumps system in Pseudomonas aeruginosa.
	1	368	72.7	11.76	card	NC_002516.2:2847776-2850887	MuxC	Multi-Drug Resistance	MuxC is one of the two necessary RND components of the MuxABC-OpmB efflux pumps system in Pseudomonas aeruginosa.
	14	749	66.98	46.94	card	U38944.1:1-1537	opcM	Multi-Drug Resistance	OpcM is an outer membrane factor protein found in Burkholderia cepacia. It is part of the CeoAB-OpcM complex.
	2	318	70.98	21.18	card	NC_002516.2:2846283-2847780	OpmB	Multi-Drug Resistance	OpmB is an outer membrane efflux protein in Pseudomonas aeruginosa that shows functional cooperation with MuxABC to form the efflux pump system MuxABC-OpmB.
	42	347	73.86	21.24	card	U57969:4623-6063	OprJ	Multi-Drug Resistance	OprJ is the outer membrane channel component of the MexCD-OprJ multidrug efflux complex.
	905	1243	69.62	23.53	card	U57969:4623-6063	OprJ	Multi-Drug Resistance	OprJ is the outer membrane channel component of the MexCD-OprJ multidrug efflux complex.
	47	383	73.37	23.03	card	NC_002516:476333-477791	OprM	Multi-Drug Resistance	OprM is an outer membrane factor protein found in Pseudomonas aeruginosa and Burkholderia vietnamiensis. It is part of the MexAB-OprM MexVW-OprM MexXY-OprM and the AmrAB-OprM complex.
	12	227	79.63	14.8	card	NC_002516:476333-477791	OprM	Multi-Drug Resistance	OprM is an outer membrane factor protein found in Pseudomonas aeruginosa and Burkholderia vietnamiensis. It is part of the MexAB-OprM MexVW-OprM MexXY-OprM and the AmrAB-OprM complex.
	163	381	73.18	31.11	card	AF173226:352-1042	smeR	Multi-Drug Resistance	smeR is the responder component of a two component signal transduction system that includes smeS
	181	426	70.28	34.88	card	AF173226:352-1042	smeR	Multi-Drug Resistance	smeR is the responder component of a two component signal transduction system that includes smeS
	1169	1685	68.64	27.64	card	AF170880:1-1849	novA	Novobiocin	A type III ABC transporter identified on the novobiocin biosynthetic gene cluster involved in the transport and resistance of novobiocin.
	1021	1230	72.86	6.66	argannot	EU370913:47851-51003	(Flq)OqxBgb	Quinolones	(Flq)OqxBgb
Acinetobacter baumannii	101	789	97.82	100	card	GG704579.1:34581-35270	ANT(3'')-IIa	Aminoglycosids	ANT(3'')-IIa is a aminoglycoside nucleotidyltransferase identified in Acinetobacter spp. via horizontal gene transfer mechanisms.
	1	1152	100	100	argannot	JF265068:955-2106	(Bla)ADC-30	Beta-lactams	(Bla)ADC-30
	1	1244	96.31	97.57	argannot	NC_010410:2507740-2509014	(Bla)BlaA2	Beta-lactams	(Bla)BlaA2
	1	696	98.56	100	argannot	NC_010410:c1997136-1996441	(Bla)Mbl	Beta-lactams	(Bla)Mbl
	1	825	100	100	argannot	EF051061:485-1309	(Bla)OXA-66	Beta-lactams	(Bla)OXA-66
	1	963	98.86	100	argannot	NC_010410:882015-882977	(Bla)Zn-hydrolase	Beta-lactams	(Bla)Zn-dependent_hydrolase
	223	1166	65.9	78.06	card	X98831.1:362-1556	EF-Tu	Elfamycin	Sequence variants of Streptomyces cinnamoneus elongation factor Tu that confer resistance to elfamycin antibiotics.
	223	1166	66.84	78.06	card	X98831.1:362-1556	EF-Tu	Elfamycin	Sequence variants of Streptomyces cinnamoneus elongation factor Tu that confer resistance to elfamycin antibiotics.
	1	1347	98.44	99.93	card	AB204810:187-1534	abeM	Multi-Drug Resistance	AbeM is an multidrug efflux pump found in Acinetobacter baumannii.
	1	330	97.88	99.7	card	NC_011595:1249019-1249349	abeS	Multi-Drug Resistance	AbeS in an efflux pump of the SMR family of transporters found in Acinetobacter baumannii.
	959	1484	67.3	16.7	card	NC_000913.3:481254-484404	acrB	Multi-Drug Resistance	Protein subunit of AcrA-AcrB-TolC multidrug efflux complex. AcrB functions as a herterotrimer which forms the inner membrane component and is primarily responsible for substrate recognition and energy transduction by acting as a drug/proton antiporter.
	1	1191	97.65	99.92	card	NC_011595:1828889-1830080	adeA	Multi-Drug Resistance	AdeA is the membrane fusion protein of the multidrug efflux complex AdeABC.
	4	3111	97.84	99.97	card	NC_011595:1830079-1833187	adeB	Multi-Drug Resistance	AdeB is the multidrug transporter of the adeABC efflux system.
	1	1398	100	100	card	CP013924.1:2063743-2065141	adeC	Multi-Drug Resistance	AdeC is the outer membrane factor of the AdeABC multidrug efflux complex. It can be replaced by other outer membrane channels and is not essential for antibiotic resistance.
	1	1221	97.62	99.92	card	NC_010400:1369125-1370343	adeF	Multi-Drug Resistance	AdeF is the membrane fusion protein of the multidrug efflux complex AdeFGH.
	1	3180	97.48	99.97	card	NC_010400:1365939-1369119	adeG	Multi-Drug Resistance	AdeG is the inner membrane transporter of the AdeFGH multidrug efflux complex.
	1	1449	98.97	99.72	card	NC_010410:1255007-1256459	adeH	Multi-Drug Resistance	AdeH is the outer membrane channel protein of the AdeFGH multidrug efflux complex.
	1	1251	99.44	99.92	card	NC_011586:3278908-3280159	adeI	Multi-Drug Resistance	AdeI is the membrane fusion protein of the AdeIJK multidrug efflux complex.
	1	3177	99.97	99.97	card	AY769962:2435-5612	adeJ	Multi-Drug Resistance	AdeJ is a RND efflux protein that acts as the inner membrane transporter of the AdeIJK efflux complex. It has 57% identity with E. coli AcrB.
	1	1455	100	99.93	card	AY769962:5611-7066	adeK	Multi-Drug Resistance	AdeK is the outer membrane factor protein in the adeIJK multidrug efflux complex.
	19	1032	99.01	100	card	KR297239.1:415-1429	adeL	Multi-Drug Resistance	AdeL is a regulator of AdeFGH in Acinetobacter baumannii. AdeL mutations are associated with AdeFGH overexpression and multidrug resistance.
	1	414	98.55	63.3	card	KF147862:1-655	adeN	Multi-Drug Resistance	AdeN is a repressor of AdeIJK a RND-type efflux pump in Acinetobacter baumannii. Its inactivation increases expression of AdeJ.
	1	744	98.12	99.87	card	HM440348:1-745	adeR	Multi-Drug Resistance	AdeR is a positive regulator of AdeABC efflux system. AdeR inactivation leads to susceptibility to aminoglycoside antibiotics.
	1	1065	96.62	98.07	card	HM440348:776-1862	adeS	Multi-Drug Resistance	AdeS is a sensor kinase in the AdeRS regulatory system of AdeABC. It is essential for AdeABC expression.
	106	1478	63.79	44.44	card	AE004091.2:4116188-4119266	mexK	Multi-Drug Resistance	mexK is the inner membrane resistance-nodulation-cell division (RND) transporter in the MexJK multidrug efflux protein.
	1877	2960	69.23	31.22	card	NC_000913.3:1170518-1173965	mfd	Multi-Drug Resistance	mfd dissociates transcription elongation complexes blocked at nonpairing lesions and mediates recruitment of DNA repair proteins. The Mfd (mutation frequency decline) protein also known as transcription-repair coupling factor is responsible for ATP-dependent removal of stalled RNA polymerase from DNA lesions by inducing forward movement of the RNA polymerase and subsequent recruitment of nucleoti…
	1309	1704	69.7	22.78	card	NC_002951:1987720-1989457	sav1866	Multi-Drug Resistance	Sav1866 is a multidrug efflux pump in the Gram-positive Staphylococcus aureus. It is a homolog of the human ABC transporter Mdr1 and pumps out toxic compounds including verapamil tetraphenylphosphorchloride and Hoechst 33342.
	651	705	100	10.02	argannot	EU935739:59054-59602	(Phe)CatB4	Phenicols	(Phe)CatB4
	651	705	100	10.02	argannot	EU935739:59054-59602	(Phe)CatB4	Phenicols	(Phe)CatB4
	52	867	100	100	argannot	EU360945:1617-2432	(Sul)SulII	Sulfamids	(Sul)SulII
	403	617	71.89	46	card	AF028811:1-463	dfrE	Sulfamids	dfrE is a chromosome-encoded dihydrofolate reductase found in Enterococcus faecalis
Agroccocus baldri G1167	25	2043	71.89	93.23	card	AF235050.4:38029-40141	parY	Aminocoumarin	point mutation on the Streptomyces rishiriensis parY resulting in aminocoumarin resistance
	133	511	75.52	17.57	card	AF235050.4:38029-40141	parY	Aminocoumarin	point mutation on the Streptomyces rishiriensis parY resulting in aminocoumarin resistance
	242	477	71.31	11.8	argannot	X53401:349-2341	(Tet)otrA	Cyclines	(Tet)otrA
	46	351	71.84	15.21	argannot	X53401:349-2341	(Tet)otrA	Cyclines	(Tet)otrA
	55	867	67.07	51.4	argannot	D38215:516-2954	(Tet)Tcr-3	Cyclines	(Tet)Tcr-3
	1	1193	81.13	99.08	card	X98831.1:362-1556	EF-Tu	Elfamycin	Sequence variants of Streptomyces cinnamoneus elongation factor Tu that confer resistance to elfamycin antibiotics.
	9	611	69.79	86.77	card	AL123456:3626663-3627350	mtrA	Multi-Drug Resistance	MtrA is a transcriptional activator of the MtrCDE multidrug efflux pump of Neisseria gonorrhoeae.
	147	791	75.54	18.74	card	NC_014638:1610637-1613961	ileS	Mupirocin	Bifidobacteria have an intrinsically resistant form of ileS (isoleucyl-tRNA synthetase) that confers resistance to mupirocin.
	1172	1778	69.49	32.5	card	AF170880:1-1849	novA	Novobiocin	A type III ABC transporter identified on the novobiocin biosynthetic gene cluster involved in the transport and resistance of novobiocin.
	1179	1559	67.93	19.96	card	AF170880:1-1849	novA	Novobiocin	A type III ABC transporter identified on the novobiocin biosynthetic gene cluster involved in the transport and resistance of novobiocin.
	1179	1559	67.93	19.96	card	AF170880:1-1849	novA	Novobiocin	A type III ABC transporter identified on the novobiocin biosynthetic gene cluster involved in the transport and resistance of novobiocin.
	1172	1778	69.49	32.5	card	AF170880:1-1849	novA	Novobiocin	A type III ABC transporter identified on the novobiocin biosynthetic gene cluster involved in the transport and resistance of novobiocin.
	1326	1921	67.7	31.42	card	AF170880:1-1849	novA	Novobiocin	A type III ABC transporter identified on the novobiocin biosynthetic gene cluster involved in the transport and resistance of novobiocin.
	1200	1839	71.47	34.07	card	AF170880:1-1849	novA	Novobiocin	A type III ABC transporter identified on the novobiocin biosynthetic gene cluster involved in the transport and resistance of novobiocin.
	91	579	69.62	31.32	argannot	AB263754:7052-8587	(Flq)QepA	Quinolones	(Flq)QepA
Bacillus idriensis G1436	662	1025	69.04	27.82	argannot	FN649414:2765051-2766355	(Bla)AmpC1	Beta-lactams	(Bla)AmpC1_Ecoli
	106	868	69.05	81.93	argannot	EF540343:3313-4236	(Bla)BCL-1	Beta-lactams	(Bla)BCL-1
	1	347	66.57	90.84	card	EF540343:1060-1441	blaI	Beta-lactams	blaI acts as a repressor of transcription of the blaZ/blaR1/blaI operon.
	1678	1946	69.89	15.46	card	KX000273.1:1-1741	tetB(60)	Cyclines	tetB(60) is a subunit of tetAB(60) an ABC transporter that confers resistance to tetracycline and tigercycline identified by screening a human saliva metagenomic library in Escherichia coli which is required for resistance.
	13	1166	65.39	95.56	card	X98831.1:362-1556	EF-Tu	Elfamycin	Sequence variants of Streptomyces cinnamoneus elongation factor Tu that confer resistance to elfamycin antibiotics.
	418	872	67.1	50.45	argannot	AF015628:399-1286	(MLS)VgbB	Macrolides	(MLS)VgbB
	1342	1559	71.1	12.54	card	NC_002951:1987720-1989457	sav1866	Multi-Drug Resistance	Sav1866 is a multidrug efflux pump in the Gram-positive Staphylococcus aureus. It is a homolog of the human ABC transporter Mdr1 and pumps out toxic compounds including verapamil tetraphenylphosphorchloride and Hoechst 33342.
	364	1703	65.15	75.95	card	NC_002951:1987720-1989457	sav1866	Multi-Drug Resistance	Sav1866 is a multidrug efflux pump in the Gram-positive Staphylococcus aureus. It is a homolog of the human ABC transporter Mdr1 and pumps out toxic compounds including verapamil tetraphenylphosphorchloride and Hoechst 33342.
	1033	1505	67.44	24.29	card	KX531049.1:1-1948	TaeA	Multi-Drug Resistance	Pleuromutilin (Tiamulin) ABC efflux pump found in Paenibacillus sp. LC231 a strain of Paenibacillus isolated from Lechuguilla Cave NM USA. Confers resistance to pleuromutilin antibiotics. Described by Pawlowski et al. 2016.
	31	642	82.5	89.08	argannot	AY238971:1055-1741	(Phe)Cat	Phenicols	(Phe)Cat
	319	2610	79.06	86.06	card	KX531052.1:1-2656	rphB	Rifampicin	rphB is a rifampin phosphotransferase protein found in Paenibacillus sp. LC231 a strain of Paenibacillus isolated from Lechuguilla Cave NM USA. Confers resistance to rifamycin antibiotics specifically rifampin through rifampin inactivation. Described by Pawlowski et al. 2016.
	340	767	70.47	92.01	card	AF028811:1-463	dfrE	Sulfamids	dfrE is a chromosome-encoded dihydrofolate reductase found in Enterococcus faecalis
Bacillus massilioglaciei	1363	1950	64.75	33.51	card	KX000273.1:1-1741	tetB(60)	Cyclines	tetB(60) is a subunit of tetAB(60) an ABC transporter that confers resistance to tetracycline and tigercycline identified by screening a human saliva metagenomic library in Escherichia coli which is required for resistance.
	2	1163	67.23	96.73	card	X98831.1:362-1556	EF-Tu	Elfamycin	Sequence variants of Streptomyces cinnamoneus elongation factor Tu that confer resistance to elfamycin antibiotics.
	55	1433	67.58	95.54	card	JYFL01000006.1:112070-113504	lmrB	Macrolides	lmrB is a chromosomally-encoded efflux pump that confers resistance to lincosamides in Bacillus subtilis
	1072	1659	67.06	33.6	card	NC_002951:1987720-1989457	sav1866	Multi-Drug Resistance	Sav1866 is a multidrug efflux pump in the Gram-positive Staphylococcus aureus. It is a homolog of the human ABC transporter Mdr1 and pumps out toxic compounds including verapamil tetraphenylphosphorchloride and Hoechst 33342.
	1348	1632	69.93	16.17	card	NC_002951:1987720-1989457	sav1866	Multi-Drug Resistance	Sav1866 is a multidrug efflux pump in the Gram-positive Staphylococcus aureus. It is a homolog of the human ABC transporter Mdr1 and pumps out toxic compounds including verapamil tetraphenylphosphorchloride and Hoechst 33342.
	1243	1706	67.92	25.97	card	HQ652506.1:374-2099	tetA(46)	Multi-Drug Resistance	tetA(46) is a subunit of tetAB(46) a heterodimeric ABC transporter that is required for conferring tetracycline resistance in Streptococcus australis isolated from the oral cavity.
Bacillus megaterium G1443	151	873	69.31	77.49	argannot	EF540343:3313-4236	(Bla)BCL-1	Beta-lactams	(Bla)BCL-1
	2	1191	66.42	98.58	card	X98831.1:362-1556	EF-Tu	Elfamycin	Sequence variants of Streptomyces cinnamoneus elongation factor Tu that confer resistance to elfamycin antibiotics.
	10	415	69.21	97.36	card	NC_004722.1:1972252-1972669	FosB	Fosfomycin	A thiol transferase that leads to the resistance of fosfomycin. Contrasting FosA FosB is dependent on the cofactor Magnesium (II) and uses either bacillithiol or L-cysteine to open up the epoxide ring of fosfomycin.
	43	569	74.15	79.91	card	GQ205627:3037-3688	vatH	Glycopeptides	vatH is a plasmid-mediated acetyltransferase found in Enterococcus faecium
	209	816	66.56	66.67	argannot	AF117258:2869-3768	(MLS)VgbA	Macrolides	(MLS)VgbA
	39	1252	64.32	83.33	card	JYFL01000006.1:112070-113504	lmrB	Macrolides	lmrB is a chromosomally-encoded efflux pump that confers resistance to lincosamides in Bacillus subtilis
	47	1103	63.88	88.73	card	M33768:195-1365	bmr	Multi-Drug Resistance	bmr is an MFS antibiotic efflux pump that confers resistance to multiple drugs including acridine dyes fluoroquinolone antibiotics chloramphenicol and puromycin
	1081	1713	68.4	36.25	card	NC_002951:1987720-1989457	sav1866	Multi-Drug Resistance	Sav1866 is a multidrug efflux pump in the Gram-positive Staphylococcus aureus. It is a homolog of the human ABC transporter Mdr1 and pumps out toxic compounds including verapamil tetraphenylphosphorchloride and Hoechst 33342.
	1033	1503	64.76	24.19	card	KX531049.1:1-1948	TaeA	Multi-Drug Resistance	Pleuromutilin (Tiamulin) ABC efflux pump found in Paenibacillus sp. LC231 a strain of Paenibacillus isolated from Lechuguilla Cave NM USA. Confers resistance to pleuromutilin antibiotics. Described by Pawlowski et al. 2016.
	281	1069	65.09	57.03	card	NC_000913.3:3219494-3220874	patA	Quinolones	PatA is an ABC transporter of Streptococcus pneumoniae that interacts with PatB to confer fluoroquinolone resistance.
	22	2605	75.44	96.99	card	KX531052.1:1-2656	rphB	Rifampicin	rphB is a rifampin phosphotransferase protein found in Paenibacillus sp. LC231 a strain of Paenibacillus isolated from Lechuguilla Cave NM USA. Confers resistance to rifamycin antibiotics specifically rifampin through rifampin inactivation. Described by Pawlowski et al. 2016.
Bacillus simplex G1422	668	1029	73	27.66	argannot	FN649414:2765051-2766355	(Bla)AmpC1	Beta-lactams	(Bla)AmpC1_Ecoli
	7	1164	67.15	96.57	card	X98831.1:362-1556	EF-Tu	Elfamycin	Sequence variants of Streptomyces cinnamoneus elongation factor Tu that confer resistance to elfamycin antibiotics.
	112	570	71.58	72.06	argannot	L12033:162-791	(MLS)VatD	Macrolides	(MLS)VatD
	197	816	66.4	68.22	argannot	AF117258:2869-3768	(MLS)VgbA	Macrolides	(MLS)VgbA
	155	1287	65.76	78.8	card	JYFL01000006.1:112070-113504	lmrB	Macrolides	lmrB is a chromosomally-encoded efflux pump that confers resistance to lincosamides in Bacillus subtilis
	1	1175	69.94	97.09	card	L32599:1237-2440	blt	Multi-Drug Resistance	blt is an MFS efflux pump that confers resistance to multiple drugs such as rhodamine and acridine dyes and fluoroquinolone antibiotics
	1391	1637	70.16	16.95	card	HG970100.1:1-1458	efrA	Multi-Drug Resistance	efrA is a part of the EfrAB efflux pump and both efrA and efrB are necessary to confer drug resistance.
	1207	1713	67.31	46.04	card	HG970103.1:1-1087	efrB	Multi-Drug Resistance	efrB is a part of the EfrAB efflux pump and both efrA and efrB are necessary to confer multidrug resistance.
	1320	1508	72.63	10.82	card	NC_002951:1987720-1989457	sav1866	Multi-Drug Resistance	Sav1866 is a multidrug efflux pump in the Gram-positive Staphylococcus aureus. It is a homolog of the human ABC transporter Mdr1 and pumps out toxic compounds including verapamil tetraphenylphosphorchloride and Hoechst 33342.
	1244	1634	71.1	22.5	card	NC_002951:1987720-1989457	sav1866	Multi-Drug Resistance	Sav1866 is a multidrug efflux pump in the Gram-positive Staphylococcus aureus. It is a homolog of the human ABC transporter Mdr1 and pumps out toxic compounds including verapamil tetraphenylphosphorchloride and Hoechst 33342.
	1347	1503	75.32	8.92	card	NC_002951:1987720-1989457	sav1866	Multi-Drug Resistance	Sav1866 is a multidrug efflux pump in the Gram-positive Staphylococcus aureus. It is a homolog of the human ABC transporter Mdr1 and pumps out toxic compounds including verapamil tetraphenylphosphorchloride and Hoechst 33342.
	31	647	82.34	89.67	argannot	AY238971:1055-1741	(Phe)Cat	Phenicols	(Phe)Cat
	1	603	80.8	22.45	card	KX531052.1:1-2656	rphB	Rifampicin	rphB is a rifampin phosphotransferase protein found in Paenibacillus sp. LC231 a strain of Paenibacillus isolated from Lechuguilla Cave NM USA. Confers resistance to rifamycin antibiotics specifically rifampin through rifampin inactivation. Described by Pawlowski et al. 2016.
	1	1095	79.59	41.24	card	KX531052.1:1-2656	rphB	Rifampicin	rphB is a rifampin phosphotransferase protein found in Paenibacillus sp. LC231 a strain of Paenibacillus isolated from Lechuguilla Cave NM USA. Confers resistance to rifamycin antibiotics specifically rifampin through rifampin inactivation. Described by Pawlowski et al. 2016.
Brevundimonas aurantiaca G1452	156	320	73.33	7.67	card	AF235050.4:38029-40141	parY	Aminocoumarin	point mutation on the Streptomyces rishiriensis parY resulting in aminocoumarin resistance
	1231	1609	70.31	17.57	card	AF235050.4:38029-40141	parY	Aminocoumarin	point mutation on the Streptomyces rishiriensis parY resulting in aminocoumarin resistance
	40	308	69.6	13.3	argannot	X53401:349-2341	(Tet)otrA	Cyclines	(Tet)otrA
	2	1191	75.29	98.58	card	X98831.1:362-1556	EF-Tu	Elfamycin	Sequence variants of Streptomyces cinnamoneus elongation factor Tu that confer resistance to elfamycin antibiotics.
	2090	2186	85.57	8.12	card	X98831.1:362-1556	EF-Tu	Elfamycin	Sequence variants of Streptomyces cinnamoneus elongation factor Tu that confer resistance to elfamycin antibiotics.
	477	703	71.62	13.59	argannot	M80346:411-2066	(MLS)CarA	Macrolides	(MLS)CarA
	1093	1305	74.42	6.73	card	U57969:1486-4618	MexD	Multi-Drug Resistance	MexD is the multidrug inner membrane transporter of the MexCD-OprJ complex.
	2214	3132	70.95	28.56	card	NC_002516:2810009-2813198	MexF	Multi-Drug Resistance	MexF is the multidrug inner membrane transporter of the MexEF-OprN complex. mexF corresponds to 2 loci in Pseudomonas aeruginosa PAO1 (gene name: mexF/mexB) and 4 loci in Pseudomonas aeruginosa LESB58 (gene name: mexD/mexB).
	1026	1352	67.28	10.34	card	AB219524.1:1177-4339	mexQ	Multi-Drug Resistance	MexQ is the inner membrane transporter of the multidrug efflux pump MexPQ-OpmE.
	118	699	Enterobacter D247	16.65	card	NC_000913.3:1170518-1173965	mfd	Multi-Drug Resistance	mfd dissociates transcription elongation complexes blocked at nonpairing lesions and mediates recruitment of DNA repair proteins. The Mfd (mutation frequency decline) protein also known as transcription-repair coupling factor is responsible for ATP-dependent removal of stalled RNA polymerase from DNA lesions by inducing forward movement of the RNA polymerase and subsequent recruitment of nucleoti…
	1303	1580	70.92	14.82	card	AF170880:1-1849	novA	Novobiocin	A type III ABC transporter identified on the novobiocin biosynthetic gene cluster involved in the transport and resistance of novobiocin.
Enterobacter cloacae	1	3114	80.03	99.97	card	NC_007779:2586251-2589365	acrD	Aminoglycosids	AcrD is an aminoglycoside efflux pump expressed in E. coli. Its expression can be induced by indole and is regulated by baeRS and cpxAR.
	1	818	82.76	99.39	card	U00096:3203310-3204132	bacA	Bacitracin	bacA is a gene that recycles undecaprenyl pyrophosphate during cell wall biosynthesis which confers resistance to bacitracin
	1	1146	99.13	99.91	card	KF992027:701-1847	ACT-22	Beta-lactams	ACT-22 is a beta-lactamase. From the Lahey list of ACT beta-lactamases.
	58	995	67.88	62.75	card	AJ011502:1-1464	OmpK37	Beta-lactams	Klebsiella pneumoniae outer membrane porin protein. Is preferentially detected in porin-deficient strains. Functional characterization of this new porin revealed a narrower pore than those of porins OmpK35 and OmpK36 which did not allow penetration by certain ##-lactams. Also when a resistant strain expresses porin OmpK37 is less susceptible to cefotaxime and cefoxitin than when it is expressing …
	148	1273	78.99	96.81	argannot	CP003785:4208384-4209544	(Bla)AmpH	Beta-lactams	(Bla)AmpH
	1	1110	77.95	75.26	card	AJ011502:1-1464	OmpK37	Beta-lactams	Klebsiella pneumoniae outer membrane porin protein. Is preferentially detected in porin-deficient strains. Functional characterization of this new porin revealed a narrower pore than those of porins OmpK35 and OmpK36 which did not allow penetration by certain ##-lactams. Also when a resistant strain expresses porin OmpK37 is less susceptible to cefotaxime and cefoxitin than when it is expressing …
	677	1072	73.24	26.86	card	AJ011502:1-1464	OmpK37	Beta-lactams	Klebsiella pneumoniae outer membrane porin protein. Is preferentially detected in porin-deficient strains. Functional characterization of this new porin revealed a narrower pore than those of porins OmpK35 and OmpK36 which did not allow penetration by certain ##-lactams. Also when a resistant strain expresses porin OmpK37 is less susceptible to cefotaxime and cefoxitin than when it is expressing …
	1	1902	82.6	100	argannot	CP002291:664439-666340	(Bla)PBP	Beta-lactams	(Bla)Penicillin_Binding_Protein_Ecoli
	1	1159	69.54	75.87	card	AJ011502:1-1464	OmpK37	Beta-lactams	Klebsiella pneumoniae outer membrane porin protein. Is preferentially detected in porin-deficient strains. Functional characterization of this new porin revealed a narrower pore than those of porins OmpK35 and OmpK36 which did not allow penetration by certain ##-lactams. Also when a resistant strain expresses porin OmpK37 is less susceptible to cefotaxime and cefoxitin than when it is expressing …
	1	523	74.95	35.61	card	AJ011502:1-1464	OmpK37	Beta-lactams	Klebsiella pneumoniae outer membrane porin protein. Is preferentially detected in porin-deficient strains. Functional characterization of this new porin revealed a narrower pore than those of porins OmpK35 and OmpK36 which did not allow penetration by certain ##-lactams. Also when a resistant strain expresses porin OmpK37 is less susceptible to cefotaxime and cefoxitin than when it is expressing …
	17	1163	77.77	93.03	card	JQ394987:1-1234	mdfA	Chloramphenicol	Multidrug efflux pump in E. coli. This multidrug efflux system was originally identified as the Cmr/CmlA chloramphenicol exporter.
	1	421	72.1	90.11	argannot	AB061440:306-770	(Tet)Tet-34	Cyclines	(Tet)Tet-34
	13	1161	72.1	95.64	card	X98831.1:362-1556	EF-Tu	Elfamycin	Sequence variants of Streptomyces cinnamoneus elongation factor Tu that confer resistance to elfamycin antibiotics.
	3	237	78.39	19.6	card	X98831.1:362-1556	EF-Tu	Elfamycin	Sequence variants of Streptomyces cinnamoneus elongation factor Tu that confer resistance to elfamycin antibiotics.
	13	873	71.12	71.61	card	X98831.1:362-1556	EF-Tu	Elfamycin	Sequence variants of Streptomyces cinnamoneus elongation factor Tu that confer resistance to elfamycin antibiotics.
	153	1263	63.6	89.41	card	NC_007779:1115841-1117068	mdtG	Fosfomycin	The MdtG protein also named YceE appears to be a member of the major facilitator superfamily of transporters and it has been reported when overexpressed to increase fosfomycin and deoxycholate resistances. mdtG is a member of the marA-soxS-rob regulon.
	135	1323	74.89	96.82	card	NC_007779:1115841-1117068	mdtG	Fosfomycin	The MdtG protein also named YceE appears to be a member of the major facilitator superfamily of transporters and it has been reported when overexpressed to increase fosfomycin and deoxycholate resistances. mdtG is a member of the marA-soxS-rob regulon.
	1583	1725	76.22	7.39	card	AY768532:1-1936	macB	Macrolides	MacB is an ATP-binding cassette (ABC) transporter that exports macrolides with 14- or 15- membered lactones. It forms an antibiotic efflux complex with MacA and TolC. macB corresponds to 1 locus in Pseudomonas aeruginosa PAO1 and 1 locus in Pseudomonas aeruginosa LESB58.
	1	1307	81.94	79.5	card	NC_000913.3:1-1645	yojI	Microcin	YojI mediates resistance to the peptide antibiotic microcin J25 when it is expressed from a multicopy vector. YojI is capable of pumping out microcin molecules. The outer membrane protein TolC in addition to YojI is required for export of microcin J25 out of the cell. Microcin J25 is thus the first known substrate for YojI.
	1	1185	79.43	99.41	card	GG749185.1:116813-118004	emrD	Multi-Drug Resistance	EmrD is a multidrug transporter from the Major Facilitator Superfamily (MFS) primarily found in Escherichia coli. EmrD couples efflux of amphipathic compounds with proton import across the plasma membrane.
	763	1053	71.33	24.46	card	NC_002516:472024-473176	MexA	Multi-Drug Resistance	MexA is the membrane fusion protein of the MexAB-OprM multidrug efflux complex.
	1	870	89.77	100	card	JQ727667:1-871	rob	Multi-Drug Resistance	rob is a positive regulator for the acrAB efflux genes and is structurally similar to SoxS and MarA.
	1	106	84.11	24.88	card	NC_000913.3:1-415	msrB	Multi-Drug Resistance	MsrB is an ABC-efflux pump expressed to Staphylococcus species that confers resistance to erythromycin and streptogramin B antibiotics. It is associated with plasmid DNA.
	1	3137	85.13	99.59	card	NC_000913.3:481254-484404	acrB	Multi-Drug Resistance	Protein subunit of AcrA-AcrB-TolC multidrug efflux complex. AcrB functions as a herterotrimer which forms the inner membrane component and is primarily responsible for substrate recognition and energy transduction by acting as a drug/proton antiporter.
	1	1194	89.11	100	card	DQ679966:300-1494	acrA	Multi-Drug Resistance	AcrA is a subunit of the AcrAB-TolC multidrug efflux system that in E. cloacae.
	13	723	71.83	97.38	card	NC_003197:2039658-2040381	sdiA	Multi-Drug Resistance	SdiA is a cell division regulator that is also a positive regulator of AcrAB only when it's expressed from a plasmid. When the sdiA gene is on the chromosome it has no effect on expression of acrAB
	1	414	87.92	99.76	card	NC_002695:1737554-1737968	H-NS	Multi-Drug Resistance	H-NS is a histone-like protein involved in global gene regulation in Gram-negative bacteria. It is a repressor of the membrane fusion protein genes acrE mdtE and emrK as well as nearby genes of many RND-type multidrug exporters.
	1	373	83.65	96.88	card	NC_007779:1621288-1621672	marA	Multi-Drug Resistance	In the presence of antibiotic stress E. coli overexpresses the global activator protein MarA which besides inducing MDR efflux pump AcrAB also down- regulates synthesis of the porin OmpF.
	1	3447	81.02	99.88	card	NC_000913.3:1170518-1173965	mfd	Multi-Drug Resistance	mfd dissociates transcription elongation complexes blocked at nonpairing lesions and mediates recruitment of DNA repair proteins. The Mfd (mutation frequency decline) protein also known as transcription-repair coupling factor is responsible for ATP-dependent removal of stalled RNA polymerase from DNA lesions by inducing forward movement of the RNA polymerase and subsequent recruitment of nucleoti…
	1	1181	76.08	97.6	card	U00096:1124118-1125327	mdtH	Multi-Drug Resistance	Multidrug resistance protein MdtH
	1	1749	82.85	100	card	NC_000913.3:966621-968370	msbA	Multi-Drug Resistance	MsbA is a multidrug resistance transporter homolog from E. coli and belongs to a superfamily of transporters that contain an adenosine triphosphate (ATP) binding cassette (ABC) which is also called a nucleotide-binding domain (NBD). MsbA is a member of the MDR-ABC transporter group by sequence homology. MsbA transports lipid A a major component of the bacterial outer cell membrane and is the only…
	1	678	75.41	99.85	card	NC_000913.3:721056-721734	kdpE	Multi-Drug Resistance	kdpE is a transcriptional activator that is part of the two-component system KdpD/KdpE that is studied for its regulatory role in potassium transport and has been identified as an adaptive regulator involved in the virulence and intracellular survival of pathogenic bacteria. kdpE regulates a range of virulence loci through direct promoter binding.
	1054	1480	67.98	13.52	card	AF173226:3768-6918	smeB	Multi-Drug Resistance	smeB is the inner membrane multidrug exporter of the efflux complex smeABC in Stenotrophomonas maltophilia
	13	375	86.78	96.8	card	JQ727668:1-376	ramA	Multi-Drug Resistance	RamA ("resistance antibiotic multiple") is a positive regulator of AcrAB-TolC and leads to high level multidrug resistance in Klebsiella pneumoniae Salmonella enterica and Enterobacter aerugenes increasing the expression of both the mar operon as well as AcrAB. RamA also decreases OmpF expression.
	130	1176	79.66	83.59	card	U00096:2154016-2155264	mdtA	Multi-Drug Resistance	MdtA is the membrane fusion protein of the multidrug efflux complex mdtABC.
	1	3123	79.94	99.9	card	U00096:2155263-2158386	mdtB	Multi-Drug Resistance	MdtB is a transporter that forms a heteromultimer complex with MdtC to form a multidrug transporter. MdtBC is part of the MdtABC-TolC efflux complex.
	2	3078	81.64	99.94	card	U00096:2158386-2161464	mdtC	Multi-Drug Resistance	MdtC is a transporter that forms a heteromultimer complex with MdtB to form a multidrug transporter. MdtBC is part of the MdtABC-TolC efflux complex. In the absence of MdtB MdtC can form a homomultimer complex that results in a functioning efflux complex with a narrower drug specificity. mdtC corresponds to 3 loci in Pseudomonas aeruginosa PAO1 (gene name: muxC/muxB) and 3 loci in Pseudomonas aer…
	1	1404	76.12	99.43	card	AP009048:2165013-2166417	baeS	Multi-Drug Resistance	BaeS is a sensor kinase in the BaeSR regulatory system. While it phosphorylates BaeR to increase its activity BaeS is not necessary for overexpressed BaeR to confer resistance.
	2	522	81.77	71.96	card	NC_007779:2166413-2167136	baeR	Multi-Drug Resistance	BaeR is a response regulator that promotes the expression of MdtABC and AcrD efflux complexes.
	1	531	83.8	100	card	NC_000913.3:2810770-2811301	emrR	Multi-Drug Resistance	EmrR is a negative regulator for the EmrAB-TolC multidrug efflux pump in E. coli. Mutations lead to EmrAB-TolC overexpression.
	1	1173	79.93	99.66	card	AP009048:2810083-2811256	emrA	Multi-Drug Resistance	EmrA is a membrane fusion protein providing an efflux pathway with EmrB and TolC between the inner and outer membranes of E. coli a Gram-negative bacterium.
	1	149	86	9.61	card	U00096:2812616-2814155	emrB	Multi-Drug Resistance	emrB is a translocase in the emrB -TolC efflux protein in E. coli. It recognizes substrates including carbonyl cyanide m-chlorophenylhydrazone (CCCP) nalidixic acid and thioloactomycin.
	1	140	84.29	9.09	card	U00096:2812616-2814155	emrB	Multi-Drug Resistance	emrB is a translocase in the emrB -TolC efflux protein in E. coli. It recognizes substrates including carbonyl cyanide m-chlorophenylhydrazone (CCCP) nalidixic acid and thioloactomycin.
	1	342	82.46	22.21	card	U00096:2812616-2814155	emrB	Multi-Drug Resistance	emrB is a translocase in the emrB -TolC efflux protein in E. coli. It recognizes substrates including carbonyl cyanide m-chlorophenylhydrazone (CCCP) nalidixic acid and thioloactomycin.
	1	1352	79.37	90.79	card	FJ768952:1-1489	tolC	Multi-Drug Resistance	TolC is a protein subunit of many multidrug efflux complexes in Gram negative bacteria. It is an outer membrane efflux protein and is constitutively open. Regulation of efflux activity is often at its periplasmic entrance by other components of the efflux complex.
	106	1081	73.78	84.21	card	U00096:3413864-3415022	acrE	Multi-Drug Resistance	AcrE is a membrane fusion protein similar to AcrA.
	1	3097	75.05	97.87	card	NC_000913.3:481254-484404	acrB	Multi-Drug Resistance	Protein subunit of AcrA-AcrB-TolC multidrug efflux complex. AcrB functions as a herterotrimer which forms the inner membrane component and is primarily responsible for substrate recognition and energy transduction by acting as a drug/proton antiporter.
	1	633	88.94	99.84	card	AP009048:4153664-4154297	CRP	Multi-Drug Resistance	CRP is a global regulator that represses MdtEF multidrug efflux pump expression.
	1	699	83.83	100	card	CP015085.1:3009840-3010539	CpxR	Multi-Drug Resistance	The Escherichia coli CpxR/CpxA system responds to general periplasmic stress and has been used as a model two-component system for transcription regulation in bacteria. CpxR/CpxA system facilitates Salmonella and E. coli resistance to cationic antimicrobial peptides.The CpxR/CpxA system can activate transcription of marRAB operon thus facilitating multidrug-resistant regulator to enhance expressi…
	1	159	84.91	11.56	card	NC_002695:4903562-4904936	cpxA	Multi-Drug Resistance	CpxA is a membrane-localized sensor kinase that is activated by envelope stress. It starts a kinase cascade that activates CpxR which promotes efflux complex expression.
	1	216	83.8	15.71	card	NC_002695:4903562-4904936	cpxA	Multi-Drug Resistance	CpxA is a membrane-localized sensor kinase that is activated by envelope stress. It starts a kinase cascade that activates CpxR which promotes efflux complex expression.
	1	525	84	38.18	card	NC_002695:4903562-4904936	cpxA	Multi-Drug Resistance	CpxA is a membrane-localized sensor kinase that is activated by envelope stress. It starts a kinase cascade that activates CpxR which promotes efflux complex expression.
	1	1622	69.63	95.33	card	U46859:22366-24058	rosB	Polymyxin	rosB is part of an efflux pump/potassium antiporter system (RosAB) in Yersinia that confers resistance to cationic antimicrobial peptides such as polymyxin B.
	49	1187	68.45	91.09	card	U46859:24295-25528	rosA	Polymyxin	rosA is part of an efflux pump/potassium antiporter system (RosAB) in Yersinia that confers resistance to cationic antimicrobial peptides such as polymyxin B.
	500	1397	65.86	53.8	card	AP009048:4338625-4340269	PmrC	Polymyxin	PmrC mediates the modification of Lipid A by the addition of 4-amino-4-deoxy-L-arabinose (L-Ara4N) and phosphoethanolamine resulting in a less negative cell membrane and decreased binding of polymyxin B.
	1	1165	75.56	99.66	card	U00096:2098447-2099614	pmrE	Polymyxin	PmrE is required for the synthesis and transfer of 4-amino-4-deoxy-L-arabinose (Ara4N) to Lipid A which allows gram-negative bacteria to resist the antimicrobial activity of cationic antimicrobial peptides and antibiotics such as polymyxin
	3	1868	71.51	92.71	card	NC_002516.2:3982021-3984010	arnA	Polymyxin	arnA modifies lipid A with 4-amino-4-deoxy-L-arabinose (Ara4N) which allows gram-negative bacteria to resist the antimicrobial activity of cationic antimicrobial peptides and antibiotics such as polymyxin. arnA is found in E. coli and P. aeruginosa.
	70	998	77.18	95.77	card	U00096:2367071-2368040	pmrF	Polymyxin	PmrF is required for the synthesis and transfer of 4-amino-4-deoxy-L-arabinose (Ara4N) to Lipid A which allows gram-negative bacteria to resist the antimicrobial activity of cationic antimicrobial peptides and antibiotics such as polymyxin. pmrF corresponds to 1 locus in Pseudomonas aeruginosa PAO1 and 1 locus in Pseudomonas aeruginosa LESB58.
	1021	1440	68.22	13.07	argannot	EU370913:47851-51003	(Flq)OqxBgb	Quinolones	(Flq)OqxBgb
	157	582	98.12	100	argannot	EU487198:217-642	(Fcyn)FosA2	Quinolones	(Fcyn)FosA2
	1	1176	86.73	100	argannot	EU370913:46652-47827	(Flq)OqxA	Quinolones	(Flq)OqxA
	1	278	90.65	8.82	argannot	EU370913:47851-51003	(Flq)OqxBgb	Quinolones	(Flq)OqxBgb
	2	318	90.85	10.07	argannot	EU370913:47851-51003	(Flq)OqxBgb	Quinolones	(Flq)OqxBgb
	1	324	88.27	10.28	argannot	EU370913:47851-51003	(Flq)OqxBgb	Quinolones	(Flq)OqxBgb
	1	129	89.92	4.09	argannot	EU370913:47851-51003	(Flq)OqxBgb	Quinolones	(Flq)OqxBgb
	1	216	92.59	6.85	argannot	EU370913:47851-51003	(Flq)OqxBgb	Quinolones	(Flq)OqxBgb
	2	126	88.8	3.96	argannot	EU370913:47851-51003	(Flq)OqxBgb	Quinolones	(Flq)OqxBgb
	2	381	90	12.07	argannot	EU370913:47851-51003	(Flq)OqxBgb	Quinolones	(Flq)OqxBgb
	1	200	93.5	6.34	argannot	EU370913:47851-51003	(Flq)OqxBgb	Quinolones	(Flq)OqxBgb
	4	1376	77.28	96.35	card	CP014358.1:2161326-2162751	mdtK	Quinolones	A multidrug and toxic compound extrusions (MATE) transporter conferring resistance to norfloxacin doxorubicin and acriflavine.
	2	342	92.08	24.71	card	NC_000913.3:3219494-3220874	patA	Quinolones	PatA is an ABC transporter of Streptococcus pneumoniae that interacts with PatB to confer fluoroquinolone resistance.
	2	653	83.28	47.25	card	NC_000913.3:3219494-3220874	patA	Quinolones	PatA is an ABC transporter of Streptococcus pneumoniae that interacts with PatB to confer fluoroquinolone resistance.
Janibacter melonis consensus	150	510	75.89	16.9	card	AF235050.4:38029-40141	parY	Aminocoumarin	point mutation on the Streptomyces rishiriensis parY resulting in aminocoumarin resistance
	55	2112	73.06	95.17	card	AF235050.4:38029-40141	parY	Aminocoumarin	point mutation on the Streptomyces rishiriensis parY resulting in aminocoumarin resistance
	46	315	72.33	13.5	argannot	X53401:349-2341	(Tet)otrA	Cyclines	(Tet)otrA
	1	1192	84.56	99.83	card	X98831.1:362-1556	EF-Tu	Elfamycin	Sequence variants of Streptomyces cinnamoneus elongation factor Tu that confer resistance to elfamycin antibiotics.
	36	695	71.49	67.18	argannot	L06249:1528-2505	(MLS)OleC	Macrolides	(MLS)OleC
	483	666	73.4	10.93	argannot	M57437:277-1923	(MLS)TlrC	Macrolides	(MLS)TlrC
	137	357	71.24	31.26	card	AF173226:352-1042	smeR	Multi-Drug Resistance	smeR is the responder component of a two component signal transduction system that includes smeS
	191	396	73.33	12.02	card	JQ768046:7761-9441	facT	Multi-Drug Resistance	Efflux protein facT confers resistance to factumycin. The gene has been heterologously expressed in S. coelicolor and its function was confirmed (Thaker et al. Med. Chem. Commun. 2012 3: 1020). It is possible that this gene can efflux other kirromycin-like elfamycins but this has not been tested.
	36	919	67.34	57.49	card	U40487.1:171-1686	lrfA	Multi-Drug Resistance	lfrA is involved in the active efflux of quinolones and is found in Mycobacterium smegmatis. lfrA corresponds to 2 loci in Pseudomonas aeruginosa PAO1 and 2 loci in Pseudomonas aeruginosa LESB58.
	19	671	70.57	93.02	card	AL123456:3626663-3627350	mtrA	Multi-Drug Resistance	MtrA is a transcriptional activator of the MtrCDE multidrug efflux pump of Neisseria gonorrhoeae.
	158	803	74.38	18.83	card	NC_014638:1610637-1613961	ileS	Mupirocin	Bifidobacteria have an intrinsically resistant form of ileS (isoleucyl-tRNA synthetase) that confers resistance to mupirocin.
	1130	1566	68.01	23.09	card	AF170880:1-1849	novA	Novobiocin	A type III ABC transporter identified on the novobiocin biosynthetic gene cluster involved in the transport and resistance of novobiocin.
	120	1799	67.7	89.62	card	AF170880:1-1849	novA	Novobiocin	A type III ABC transporter identified on the novobiocin biosynthetic gene cluster involved in the transport and resistance of novobiocin.
	1326	1946	67.77	32.88	card	AF170880:1-1849	novA	Novobiocin	A type III ABC transporter identified on the novobiocin biosynthetic gene cluster involved in the transport and resistance of novobiocin.
	1162	1808	67.17	34.23	card	AF170880:1-1849	novA	Novobiocin	A type III ABC transporter identified on the novobiocin biosynthetic gene cluster involved in the transport and resistance of novobiocin.
	1206	1836	70.43	33.1	card	AF170880:1-1849	novA	Novobiocin	A type III ABC transporter identified on the novobiocin biosynthetic gene cluster involved in the transport and resistance of novobiocin.
	1158	1740	67.63	31.1	card	AF170880:1-1849	novA	Novobiocin	A type III ABC transporter identified on the novobiocin biosynthetic gene cluster involved in the transport and resistance of novobiocin.
	226	1171	67.61	80.57	card	U00096:2098447-2099614	pmrE	Polymyxin	PmrE is required for the synthesis and transfer of 4-amino-4-deoxy-L-arabinose (Ara4N) to Lipid A which allows gram-negative bacteria to resist the antimicrobial activity of cationic antimicrobial peptides and antibiotics such as polymyxin
	127	305	72.63	51.88	card	HQ203032:1-346	RbpA	Rifampicin	RNA-polymerase binding protein which confers resistance to rifampin.
	244	335	83.7	21.3	card	AF001493:1-433	arr-1	Rifampicin	arr-1 is a chromosome-encoded ribosyltransferase found in Mycobacterium smegmatis
Kocuria rhizophila G1424	52	428	76.84	17.71	card	AF235050.4:38029-40141	parY	Aminocoumarin	point mutation on the Streptomyces rishiriensis parY resulting in aminocoumarin resistance
	16	2064	72.41	94.46	card	AF235050.4:38029-40141	parY	Aminocoumarin	point mutation on the Streptomyces rishiriensis parY resulting in aminocoumarin resistance
	43	613	65.28	44.68	argannot	AF030344:462-1721	(Tet)TetV	Cyclines	(Tet)TetV
	40	354	70.53	15.61	argannot	X53401:349-2341	(Tet)otrA	Cyclines	(Tet)otrA
	2	1189	78.58	99.16	card	X98831.1:362-1556	EF-Tu	Elfamycin	Sequence variants of Streptomyces cinnamoneus elongation factor Tu that confer resistance to elfamycin antibiotics.
	155	668	70.87	74.56	card	AL123456:3626663-3627350	mtrA	Multi-Drug Resistance	MtrA is a transcriptional activator of the MtrCDE multidrug efflux pump of Neisseria gonorrhoeae.
	1	467	70.28	30.56	card	U40487.1:171-1686	lrfA	Multi-Drug Resistance	lfrA is involved in the active efflux of quinolones and is found in Mycobacterium smegmatis. lfrA corresponds to 2 loci in Pseudomonas aeruginosa PAO1 and 2 loci in Pseudomonas aeruginosa LESB58.
	169	689	79.01	15.58	card	NC_014638:1610637-1613961	ileS	Mupirocin	Bifidobacteria have an intrinsically resistant form of ileS (isoleucyl-tRNA synthetase) that confers resistance to mupirocin.
	1229	1829	67.92	31.8	card	AF170880:1-1849	novA	Novobiocin	A type III ABC transporter identified on the novobiocin biosynthetic gene cluster involved in the transport and resistance of novobiocin.
Microbacterium hydrocarbonoxydans G1438	43	408	71.55	17.07	card	AF235050.4:38029-40141	parY	Aminocoumarin	point mutation on the Streptomyces rishiriensis parY resulting in aminocoumarin resistance
	78	2103	70.09	92.61	card	AF235050.4:38029-40141	parY	Aminocoumarin	point mutation on the Streptomyces rishiriensis parY resulting in aminocoumarin resistance
	46	354	70.29	15.31	argannot	X53401:349-2341	(Tet)otrA	Cyclines	(Tet)otrA
	1	1191	79.72	98.58	card	X98831.1:362-1556	EF-Tu	Elfamycin	Sequence variants of Streptomyces cinnamoneus elongation factor Tu that confer resistance to elfamycin antibiotics.
	98	715	69.95	59.38	card	KF478993:4910-5948	vanSO	Glycopeptides	vanSO is a vanS variant found in the vanO gene cluster
	1	281	82.21	39.97	card	KF478993:6003-6705	vanRO	Glycopeptides	vanRO is a vanR variant found in the vanO gene cluster
	1	129	77.69	18.21	card	KF478993:6003-6705	vanRO	Glycopeptides	vanRO is a vanR variant found in the vanO gene cluster
	60	603	71.12	54.5	argannot	L06249:1528-2505	(MLS)OleC	Macrolides	(MLS)OleC
	163	407	69.8	16.17	card	U40487.1:171-1686	lrfA	Multi-Drug Resistance	lfrA is involved in the active efflux of quinolones and is found in Mycobacterium smegmatis. lfrA corresponds to 2 loci in Pseudomonas aeruginosa PAO1 and 2 loci in Pseudomonas aeruginosa LESB58.
	1	393	72.91	25.81	card	U40487.1:171-1686	lrfA	Multi-Drug Resistance	lfrA is involved in the active efflux of quinolones and is found in Mycobacterium smegmatis. lfrA corresponds to 2 loci in Pseudomonas aeruginosa PAO1 and 2 loci in Pseudomonas aeruginosa LESB58.
	26	213	81.48	7.63	card	NC_014638:1610637-1613961	ileS	Mupirocin	Bifidobacteria have an intrinsically resistant form of ileS (isoleucyl-tRNA synthetase) that confers resistance to mupirocin.
	1	125	79.2	3.76	card	NC_014638:1610637-1613961	ileS	Mupirocin	Bifidobacteria have an intrinsically resistant form of ileS (isoleucyl-tRNA synthetase) that confers resistance to mupirocin.
	40	212	76.3	7.2	card	NC_014638:1610637-1613961	ileS	Mupirocin	Bifidobacteria have an intrinsically resistant form of ileS (isoleucyl-tRNA synthetase) that confers resistance to mupirocin.
	1	270	69.85	14.49	card	AF170880:1-1849	novA	Novobiocin	A type III ABC transporter identified on the novobiocin biosynthetic gene cluster involved in the transport and resistance of novobiocin.
	1028	1629	66.72	31.8	card	AF170880:1-1849	novA	Novobiocin	A type III ABC transporter identified on the novobiocin biosynthetic gene cluster involved in the transport and resistance of novobiocin.
	1	248	68.95	13.41	card	AF170880:1-1849	novA	Novobiocin	A type III ABC transporter identified on the novobiocin biosynthetic gene cluster involved in the transport and resistance of novobiocin.
	222	333	81.25	25.93	card	AF001493:1-433	arr-1	Rifampicin	arr-1 is a chromosome-encoded ribosyltransferase found in Mycobacterium smegmatis
Micrococcus luteus G1425	142	518	76.52	17.76	card	AF235050.4:38029-40141	parY	Aminocoumarin	point mutation on the Streptomyces rishiriensis parY resulting in aminocoumarin resistance
	14	2087	73.17	95.98	card	AF235050.4:38029-40141	parY	Aminocoumarin	point mutation on the Streptomyces rishiriensis parY resulting in aminocoumarin resistance
	160	465	72.88	15.36	argannot	X53401:349-2341	(Tet)otrA	Cyclines	(Tet)otrA
	1	1189	80.23	98.99	card	X98831.1:362-1556	EF-Tu	Elfamycin	Sequence variants of Streptomyces cinnamoneus elongation factor Tu that confer resistance to elfamycin antibiotics.
	483	667	72.73	11.07	argannot	M80346:411-2066	(MLS)CarA	Macrolides	(MLS)CarA
	300	524	72.49	13.62	argannot	NC_016113:803268-384890	(MLS)TlrC	Macrolides	(MLS)TlrC
	8	671	72.16	96.08	card	AL123456:3626663-3627350	mtrA	Multi-Drug Resistance	MtrA is a transcriptional activator of the MtrCDE multidrug efflux pump of Neisseria gonorrhoeae.
	154	663	79.3	15.13	card	NC_014638:1610637-1613961	ileS	Mupirocin	Bifidobacteria have an intrinsically resistant form of ileS (isoleucyl-tRNA synthetase) that confers resistance to mupirocin.
	1192	1839	69.16	34.67	card	AF170880:1-1849	novA	Novobiocin	A type III ABC transporter identified on the novobiocin biosynthetic gene cluster involved in the transport and resistance of novobiocin.
	61	655	65.57	31.48	card	AF170880:1-1849	novA	Novobiocin	A type III ABC transporter identified on the novobiocin biosynthetic gene cluster involved in the transport and resistance of novobiocin.
Paenibacillus provencensis G1439	2	303	83.11	34.01	argannot	CP002869:c4442322-4441435	(AGly)AadK-Pm	Aminoglycosids	(AGly)AadK-Pm
	1	359	86.63	40.43	argannot	CP002869:c4442322-4441435	(AGly)AadK-Pm	Aminoglycosids	(AGly)AadK-Pm
	1721	1949	72.17	13.1	card	KX000273.1:1-1741	tetB(60)	Cyclines	tetB(60) is a subunit of tetAB(60) an ABC transporter that confers resistance to tetracycline and tigercycline identified by screening a human saliva metagenomic library in Escherichia coli which is required for resistance.
	2	1166	67.01	96.9	card	X98831.1:362-1556	EF-Tu	Elfamycin	Sequence variants of Streptomyces cinnamoneus elongation factor Tu that confer resistance to elfamycin antibiotics.
	431	839	69.56	34.8	argannot	DQ018710:3721-4881	(Gly)VanS-Pt2	Glycopeptides	(Gly)VanS-Pt2
	20	693	71.13	95.71	card	NC_007907:4201993-4202692	vanRI	Glycopeptides	VanRI is the regulatory transcriptional activator in the VanSR regulator within the VanI glycopeptide resistance gene cluster.
	1	860	72.77	99.19	card	KX531046.1:1-865	LlmA	Macrolides	Lincosamide (Clindamycin) resistant (putative) ribosomal methyltransferase related to the RlmK 23S rRNA methyltransferase COG family. Detected in Paenibacillus sp. LC231 an isolated strain of Paenibacillus found in Lechuguilla Cave NM USA. Described by Pawlowski et al. 2016.
	161	1446	67.9	88.35	card	JYFL01000006.1:112070-113504	lmrB	Macrolides	lmrB is a chromosomally-encoded efflux pump that confers resistance to lincosamides in Bacillus subtilis
	1694	1925	75.43	11.92	card	KX531049.1:1-1948	TaeA	Multi-Drug Resistance	Pleuromutilin (Tiamulin) ABC efflux pump found in Paenibacillus sp. LC231 a strain of Paenibacillus isolated from Lechuguilla Cave NM USA. Confers resistance to pleuromutilin antibiotics. Described by Pawlowski et al. 2016.
	10	2607	72.21	97.44	card	KX531052.1:1-2656	rphB	Rifampicin	rphB is a rifampin phosphotransferase protein found in Paenibacillus sp. LC231 a strain of Paenibacillus isolated from Lechuguilla Cave NM USA. Confers resistance to rifamycin antibiotics specifically rifampin through rifampin inactivation. Described by Pawlowski et al. 2016.
Paenibacillus urinalis G1453	1	840	81.91	94.59	argannot	CP002869:c4442322-4441435	(AGly)AadK-Pm	Aminoglycosids	(AGly)AadK-Pm
	1721	1949	70.74	13.16	card	KX000273.1:1-1741	tetB(60)	Cyclines	tetB(60) is a subunit of tetAB(60) an ABC transporter that confers resistance to tetracycline and tigercycline identified by screening a human saliva metagenomic library in Escherichia coli which is required for resistance.
	2	1166	66.16	96.9	card	X98831.1:362-1556	EF-Tu	Elfamycin	Sequence variants of Streptomyces cinnamoneus elongation factor Tu that confer resistance to elfamycin antibiotics.
	431	662	72.84	20.09	argannot	M97297:4649-5803	(Gly)VanS-A	Glycopeptides	(Gly)VanS-A
	20	693	71.24	95.85	card	NC_007907:4201993-4202692	vanRI	Glycopeptides	VanRI is the regulatory transcriptional activator in the VanSR regulator within the VanI glycopeptide resistance gene cluster.
	1	860	72.89	99.19	card	KX531046.1:1-865	LlmA	Macrolides	Lincosamide (Clindamycin) resistant (putative) ribosomal methyltransferase related to the RlmK 23S rRNA methyltransferase COG family. Detected in Paenibacillus sp. LC231 an isolated strain of Paenibacillus found in Lechuguilla Cave NM USA. Described by Pawlowski et al. 2016.
	161	1296	68.71	78.03	card	JYFL01000006.1:112070-113504	lmrB	Macrolides	lmrB is a chromosomally-encoded efflux pump that confers resistance to lincosamides in Bacillus subtilis
	1	1925	71.18	97.64	card	KX531049.1:1-1948	TaeA	Multi-Drug Resistance	Pleuromutilin (Tiamulin) ABC efflux pump found in Paenibacillus sp. LC231 a strain of Paenibacillus isolated from Lechuguilla Cave NM USA. Confers resistance to pleuromutilin antibiotics. Described by Pawlowski et al. 2016.
	13	2610	71.22	97.33	card	KX531052.1:1-2656	rphB	Rifampicin	rphB is a rifampin phosphotransferase protein found in Paenibacillus sp. LC231 a strain of Paenibacillus isolated from Lechuguilla Cave NM USA. Confers resistance to rifamycin antibiotics specifically rifampin through rifampin inactivation. Described by Pawlowski et al. 2016.
Pantoea_massiliensis_G1572	1	3102	74.9	99.29	card	NC_007779:2586251-2589365	acrD	Aminoglycosids	AcrD is an aminoglycoside efflux pump expressed in E. coli. Its expression can be induced by indole and is regulated by baeRS and cpxAR.
	26	803	75.8	94.53	card	U00096:3203310-3204132	bacA	Bacitracin	bacA is a gene that recycles undecaprenyl pyrophosphate during cell wall biosynthesis which confers resistance to bacitracin
	244	1128	64.14	75.83	argannot	FJ237369:1-1146	(Bla)ACT-5	Beta-lactams	(Bla)ACT-5
	103	1106	77.5	86.05	argannot	CP003785:4208384-4209544	(Bla)AmpH	Beta-lactams	(Bla)AmpH
	49	1865	76.5	95.32	argannot	CP002291:664439-666340	(Bla)PBP	Beta-lactams	(Bla)Penicillin_Binding_Protein_Ecoli
	400	1775	64.77	71.4	argannot	CP002291:664439-666340	(Bla)PBP	Beta-lactams	(Bla)Penicillin_Binding_Protein_Ecoli
	28	539	72.92	34.24	card	AJ011502:1-1464	OmpK37	Beta-lactams	Klebsiella pneumoniae outer membrane porin protein. Is preferentially detected in porin-deficient strains. Functional characterization of this new porin revealed a narrower pore than those of porins OmpK35 and OmpK36 which did not allow penetration by certain ##-lactams. Also when a resistant strain expresses porin OmpK37 is less susceptible to cefotaxime and cefoxitin than when it is expressing …
	54	1007	64.35	63.5	card	AJ011502:1-1464	OmpK37	Beta-lactams	Klebsiella pneumoniae outer membrane porin protein. Is preferentially detected in porin-deficient strains. Functional characterization of this new porin revealed a narrower pore than those of porins OmpK35 and OmpK36 which did not allow penetration by certain ##-lactams. Also when a resistant strain expresses porin OmpK37 is less susceptible to cefotaxime and cefoxitin than when it is expressing …
	64	1111	66.42	68.76	card	AJ011502:1-1464	OmpK37	Beta-lactams	Klebsiella pneumoniae outer membrane porin protein. Is preferentially detected in porin-deficient strains. Functional characterization of this new porin revealed a narrower pore than those of porins OmpK35 and OmpK36 which did not allow penetration by certain ##-lactams. Also when a resistant strain expresses porin OmpK37 is less susceptible to cefotaxime and cefoxitin than when it is expressing …
	55	1055	67.11	65.55	card	AJ011502:1-1464	OmpK37	Beta-lactams	Klebsiella pneumoniae outer membrane porin protein. Is preferentially detected in porin-deficient strains. Functional characterization of this new porin revealed a narrower pore than those of porins OmpK35 and OmpK36 which did not allow penetration by certain ##-lactams. Also when a resistant strain expresses porin OmpK37 is less susceptible to cefotaxime and cefoxitin than when it is expressing …
	78	419	70.81	72.69	argannot	AB061440:306-770	(Tet)Tet-34	Cyclines	(Tet)Tet-34
	4	1119	72.77	92.96	card	X98831.1:362-1556	EF-Tu	Elfamycin	Sequence variants of Streptomyces cinnamoneus elongation factor Tu that confer resistance to elfamycin antibiotics.
	21	1107	65.72	87.7	card	NC_007779:1115841-1117068	mdtG	Fosfomycin	The MdtG protein also named YceE appears to be a member of the major facilitator superfamily of transporters and it has been reported when overexpressed to increase fosfomycin and deoxycholate resistances. mdtG is a member of the marA-soxS-rob regulon.
	481	668	73.3	11.17	argannot	M80346:411-2066	(MLS)CarA	Macrolides	(MLS)CarA
	1	1307	76.72	79.32	card	NC_000913.3:1-1645	yojI	Microcin	YojI mediates resistance to the peptide antibiotic microcin J25 when it is expressed from a multicopy vector. YojI is capable of pumping out microcin molecules. The outer membrane protein TolC in addition to YojI is required for export of microcin J25 out of the cell. Microcin J25 is thus the first known substrate for YojI.
	1	3104	77.92	98.19	card	NC_000913.3:481254-484404	acrB	Multi-Drug Resistance	Protein subunit of AcrA-AcrB-TolC multidrug efflux complex. AcrB functions as a herterotrimer which forms the inner membrane component and is primarily responsible for substrate recognition and energy transduction by acting as a drug/proton antiporter.
	22	689	75.41	91.57	card	NC_007779:2166413-2167136	baeR	Multi-Drug Resistance	BaeR is a response regulator that promotes the expression of MdtABC and AcrD efflux complexes.
	34	1307	69.18	89.18	card	AP009048:2165013-2166417	baeS	Multi-Drug Resistance	BaeS is a sensor kinase in the BaeSR regulatory system. While it phosphorylates BaeR to increase its activity BaeS is not necessary for overexpressed BaeR to confer resistance.
	1	1361	79.3	98.91	card	NC_002695:4903562-4904936	cpxA	Multi-Drug Resistance	CpxA is a membrane-localized sensor kinase that is activated by envelope stress. It starts a kinase cascade that activates CpxR which promotes efflux complex expression.
	1	699	80.31	99.71	card	CP015085.1:3009840-3010539	CpxR	Multi-Drug Resistance	The Escherichia coli CpxR/CpxA system responds to general periplasmic stress and has been used as a model two-component system for transcription regulation in bacteria. CpxR/CpxA system facilitates Salmonella and E. coli resistance to cationic antimicrobial peptides.The CpxR/CpxA system can activate transcription of marRAB operon thus facilitating multidrug-resistant regulator to enhance expressi…
	1	629	84.26	99.21	card	AP009048:4153664-4154297	CRP	Multi-Drug Resistance	CRP is a global regulator that represses MdtEF multidrug efflux pump expression.
	121	1046	73.65	78.88	card	AP009048:2810083-2811256	emrA	Multi-Drug Resistance	EmrA is a membrane fusion protein providing an efflux pathway with EmrB and TolC between the inner and outer membranes of E. coli a Gram-negative bacterium.
	7	1534	79.69	99.03	card	U00096:2812616-2814155	emrB	Multi-Drug Resistance	emrB is a translocase in the emrB -TolC efflux protein in E. coli. It recognizes substrates including carbonyl cyanide m-chlorophenylhydrazone (CCCP) nalidixic acid and thioloactomycin.
	32	1152	69.81	93.12	card	GG749185.1:116813-118004	emrD	Multi-Drug Resistance	EmrD is a multidrug transporter from the Major Facilitator Superfamily (MFS) primarily found in Escherichia coli. EmrD couples efflux of amphipathic compounds with proton import across the plasma membrane.
	1	503	76.63	94.35	card	NC_000913.3:2810770-2811301	emrR	Multi-Drug Resistance	EmrR is a negative regulator for the EmrAB-TolC multidrug efflux pump in E. coli. Mutations lead to EmrAB-TolC overexpression.
	1	1082	74.4	90.37	card	DQ679966:300-1494	acrA	Multi-Drug Resistance	AcrA is a subunit of the AcrAB-TolC multidrug efflux system that in E. cloacae.
	1	396	69.98	93.49	card	NC_002695:1737554-1737968	H-NS	Multi-Drug Resistance	H-NS is a histone-like protein involved in global gene regulation in Gram-negative bacteria. It is a repressor of the membrane fusion protein genes acrE mdtE and emrK as well as nearby genes of many RND-type multidrug exporters.
	1	402	75.19	96.63	card	NC_002695:1737554-1737968	H-NS	Multi-Drug Resistance	H-NS is a histone-like protein involved in global gene regulation in Gram-negative bacteria. It is a repressor of the membrane fusion protein genes acrE mdtE and emrK as well as nearby genes of many RND-type multidrug exporters.
	256	399	75.51	34.7	card	NC_002695:1737554-1737968	H-NS	Multi-Drug Resistance	H-NS is a histone-like protein involved in global gene regulation in Gram-negative bacteria. It is a repressor of the membrane fusion protein genes acrE mdtE and emrK as well as nearby genes of many RND-type multidrug exporters.
	31	685	73.11	96.02	card	NC_000913.3:721056-721734	kdpE	Multi-Drug Resistance	kdpE is a transcriptional activator that is part of the two-component system KdpD/KdpE that is studied for its regulatory role in potassium transport and has been identified as an adaptive regulator involved in the virulence and intracellular survival of pathogenic bacteria. kdpE regulates a range of virulence loci through direct promoter binding.
	163	1173	74.23	80.78	card	U00096:2154016-2155264	mdtA	Multi-Drug Resistance	MdtA is the membrane fusion protein of the multidrug efflux complex mdtABC.
	28	3074	77.14	97.31	card	U00096:2155263-2158386	mdtB	Multi-Drug Resistance	MdtB is a transporter that forms a heteromultimer complex with MdtC to form a multidrug transporter. MdtBC is part of the MdtABC-TolC efflux complex.
	1	3037	74.89	98.34	card	U00096:2158386-2161464	mdtC	Multi-Drug Resistance	MdtC is a transporter that forms a heteromultimer complex with MdtB to form a multidrug transporter. MdtBC is part of the MdtABC-TolC efflux complex. In the absence of MdtB MdtC can form a homomultimer complex that results in a functioning efflux complex with a narrower drug specificity. mdtC corresponds to 3 loci in Pseudomonas aeruginosa PAO1 (gene name: muxC/muxB) and 3 loci in Pseudomonas aer…
	140	867	69.39	62.53	card	NC_002516:472024-473176	MexA	Multi-Drug Resistance	MexA is the membrane fusion protein of the MexAB-OprM multidrug efflux complex.
	976	1495	70.34	16.41	card	U57969:1486-4618	MexD	Multi-Drug Resistance	MexD is the multidrug inner membrane transporter of the MexCD-OprJ complex.
	1036	1574	73.01	17.09	card	AB015853:1331-4472	mexY	Multi-Drug Resistance	MexY is the RND-type membrane protein of the efflux complex MexXY-OprM.
	1	3404	77.23	98.38	card	NC_000913.3:1170518-1173965	mfd	Multi-Drug Resistance	mfd dissociates transcription elongation complexes blocked at nonpairing lesions and mediates recruitment of DNA repair proteins. The Mfd (mutation frequency decline) protein also known as transcription-repair coupling factor is responsible for ATP-dependent removal of stalled RNA polymerase from DNA lesions by inducing forward movement of the RNA polymerase and subsequent recruitment of nucleoti…
	1	1749	77.4	99.83	card	NC_000913.3:966621-968370	msbA	Multi-Drug Resistance	MsbA is a multidrug resistance transporter homolog from E. coli and belongs to a superfamily of transporters that contain an adenosine triphosphate (ATP) binding cassette (ABC) which is also called a nucleotide-binding domain (NBD). MsbA is a member of the MDR-ABC transporter group by sequence homology. MsbA transports lipid A a major component of the bacterial outer cell membrane and is the only…
	2662	3138	79.96	15.17	card	NC_002516.2:2850883-2854015	MuxB	Multi-Drug Resistance	MuxB is one of the two necessary RND components in the Pseudomonas aeruginosa efflux pump system MuxABC-OpmB.
	27	3051	68.41	95.37	card	NC_002516.2:2847776-2850887	MuxC	Multi-Drug Resistance	MuxC is one of the two necessary RND components of the MuxABC-OpmB efflux pumps system in Pseudomonas aeruginosa.
	34	1374	65.19	88.51	card	NC_002516.2:2846283-2847780	OpmB	Multi-Drug Resistance	OpmB is an outer membrane efflux protein in Pseudomonas aeruginosa that shows functional cooperation with MuxABC to form the efflux pump system MuxABC-OpmB.
	391	1162	66.54	52.16	card	NC_002516:476333-477791	OprM	Multi-Drug Resistance	OprM is an outer membrane factor protein found in Pseudomonas aeruginosa and Burkholderia vietnamiensis. It is part of the MexAB-OprM MexVW-OprM MexXY-OprM and the AmrAB-OprM complex.
	1	792	71.73	90.92	card	NC_000913.3:4634441-4635311	rob	Multi-Drug Resistance	rob is a positive regulator for the acrAB efflux genes and is structurally similar to SoxS and MarA.
	537	721	72.43	25.55	card	NC_003197:2039658-2040381	sdiA	Multi-Drug Resistance	SdiA is a cell division regulator that is also a positive regulator of AcrAB only when it's expressed from a plasmid. When the sdiA gene is on the chromosome it has no effect on expression of acrAB
	43	416	70.71	78.34	card	NC_002516.2:2503425-2503896	soxR	Multi-Drug Resistance	SoxR is a redox-sensitive transcriptional activator that induces expression of a small regulon that includes the RND efflux pump-encoding operon mexGHI-opmD. SoxR was shown to be activated by pyocyanin.
	1	1372	73.72	91.73	card	FJ768952:1-1489	tolC	Multi-Drug Resistance	TolC is a protein subunit of many multidrug efflux complexes in Gram negative bacteria. It is an outer membrane efflux protein and is constitutively open. Regulation of efflux activity is often at its periplasmic entrance by other components of the efflux complex.
	976	1334	69.64	11.78	card	NC_002516.2:179522-182570	TriC	Multi-Drug Resistance	TriC is a resistance nodulation cell division (RND) transporter that is a part of TriABC-OpmH a triclosan-specific efflux protein.
	346	568	70.22	35.08	argannot	M58472:148-777	(Phe)CatB1	Phenicols	(Phe)CatB1
	3	1949	73.16	96.73	card	NC_002516.2:3982021-3984010	arnA	Polymyxin	arnA modifies lipid A with 4-amino-4-deoxy-L-arabinose (Ara4N) which allows gram-negative bacteria to resist the antimicrobial activity of cationic antimicrobial peptides and antibiotics such as polymyxin. arnA is found in E. coli and P. aeruginosa.
	706	1463	67.14	45.35	card	AP009048:4338625-4340269	PmrC	Polymyxin	PmrC mediates the modification of Lipid A by the addition of 4-amino-4-deoxy-L-arabinose (L-Ara4N) and phosphoethanolamine resulting in a less negative cell membrane and decreased binding of polymyxin B.
	119	1485	71.43	82.55	card	AP009048:4338625-4340269	PmrC	Polymyxin	PmrC mediates the modification of Lipid A by the addition of 4-amino-4-deoxy-L-arabinose (L-Ara4N) and phosphoethanolamine resulting in a less negative cell membrane and decreased binding of polymyxin B.
	25	954	72.59	95.67	card	U00096:2367071-2368040	pmrF	Polymyxin	PmrF is required for the synthesis and transfer of 4-amino-4-deoxy-L-arabinose (Ara4N) to Lipid A which allows gram-negative bacteria to resist the antimicrobial activity of cationic antimicrobial peptides and antibiotics such as polymyxin. pmrF corresponds to 1 locus in Pseudomonas aeruginosa PAO1 and 1 locus in Pseudomonas aeruginosa LESB58.
	1	1644	68.69	95.92	card	U46859:22366-24058	rosB	Polymyxin	rosB is part of an efflux pump/potassium antiporter system (RosAB) in Yersinia that confers resistance to cationic antimicrobial peptides such as polymyxin B.
	43	1122	72.04	91.41	argannot	EU370913:46652-47827	(Flq)OqxA	Quinolones	(Flq)OqxA
	1	3121	83.31	98.99	argannot	EU370913:47851-51003	(Flq)OqxBgb	Quinolones	(Flq)OqxBgb
	56	1364	72.12	90.6	card	CP014358.1:2161326-2162751	mdtK	Quinolones	A multidrug and toxic compound extrusions (MATE) transporter conferring resistance to norfloxacin doxorubicin and acriflavine.
	1	224	88.89	96.54	card	KU302801:102200-102431	vgaC	Streptogramin	vgaC is an efflux protein expressed in staphylococci that confers resistance to streptogramin A antibiotics and related compounds. It is associated with plasmid DNA.
	1	226	75.33	97.4	card	KU302801:102200-102431	vgaC	Streptogramin	vgaC is an efflux protein expressed in staphylococci that confers resistance to streptogramin A antibiotics and related compounds. It is associated with plasmid DNA.
Pantoea_septica_G1442	1	3102	74.9	99.29	card	NC_007779:2586251-2589365	acrD	Aminoglycosids	AcrD is an aminoglycoside efflux pump expressed in E. coli. Its expression can be induced by indole and is regulated by baeRS and cpxAR.
	26	803	75.8	94.53	card	U00096:3203310-3204132	bacA	Bacitracin	bacA is a gene that recycles undecaprenyl pyrophosphate during cell wall biosynthesis which confers resistance to bacitracin
	103	1106	77.5	86.05	argannot	CP003785:4208384-4209544	(Bla)AmpH	Beta-lactams	(Bla)AmpH
	49	1865	76.5	95.32	argannot	CP002291:664439-666340	(Bla)PBP	Beta-lactams	(Bla)Penicillin_Binding_Protein_Ecoli
	400	1775	64.77	71.4	argannot	CP002291:664439-666340	(Bla)PBP	Beta-lactams	(Bla)Penicillin_Binding_Protein_Ecoli
	55	1055	67.11	65.55	card	AJ011502:1-1464	OmpK37	Beta-lactams	Klebsiella pneumoniae outer membrane porin protein. Is preferentially detected in porin-deficient strains. Functional characterization of this new porin revealed a narrower pore than those of porins OmpK35 and OmpK36 which did not allow penetration by certain ##-lactams. Also when a resistant strain expresses porin OmpK37 is less susceptible to cefotaxime and cefoxitin than when it is expressing …
	54	1007	64.35	63.5	card	AJ011502:1-1464	OmpK37	Beta-lactams	Klebsiella pneumoniae outer membrane porin protein. Is preferentially detected in porin-deficient strains. Functional characterization of this new porin revealed a narrower pore than those of porins OmpK35 and OmpK36 which did not allow penetration by certain ##-lactams. Also when a resistant strain expresses porin OmpK37 is less susceptible to cefotaxime and cefoxitin than when it is expressing …
	64	1111	66.42	68.76	card	AJ011502:1-1464	OmpK37	Beta-lactams	Klebsiella pneumoniae outer membrane porin protein. Is preferentially detected in porin-deficient strains. Functional characterization of this new porin revealed a narrower pore than those of porins OmpK35 and OmpK36 which did not allow penetration by certain ##-lactams. Also when a resistant strain expresses porin OmpK37 is less susceptible to cefotaxime and cefoxitin than when it is expressing …
	78	419	70.81	72.69	argannot	AB061440:306-770	(Tet)Tet-34	Cyclines	(Tet)Tet-34
	21	1107	65.72	87.7	card	NC_007779:1115841-1117068	mdtG	Fosfomycin	The MdtG protein also named YceE appears to be a member of the major facilitator superfamily of transporters and it has been reported when overexpressed to increase fosfomycin and deoxycholate resistances. mdtG is a member of the marA-soxS-rob regulon.
	481	668	73.3	11.17	argannot	M80346:411-2066	(MLS)CarA	Macrolides	(MLS)CarA
	1	1307	76.72	79.32	card	NC_000913.3:1-1645	yojI	Microcin	YojI mediates resistance to the peptide antibiotic microcin J25 when it is expressed from a multicopy vector. YojI is capable of pumping out microcin molecules. The outer membrane protein TolC in addition to YojI is required for export of microcin J25 out of the cell. Microcin J25 is thus the first known substrate for YojI.
	1	1922	77.72	60.83	card	NC_000913.3:481254-484404	acrB	Multi-Drug Resistance	Protein subunit of AcrA-AcrB-TolC multidrug efflux complex. AcrB functions as a herterotrimer which forms the inner membrane component and is primarily responsible for substrate recognition and energy transduction by acting as a drug/proton antiporter.
	1	1224	78.76	38.67	card	NC_000913.3:481254-484404	acrB	Multi-Drug Resistance	Protein subunit of AcrA-AcrB-TolC multidrug efflux complex. AcrB functions as a herterotrimer which forms the inner membrane component and is primarily responsible for substrate recognition and energy transduction by acting as a drug/proton antiporter.
	22	689	75.41	91.57	card	NC_007779:2166413-2167136	baeR	Multi-Drug Resistance	BaeR is a response regulator that promotes the expression of MdtABC and AcrD efflux complexes.
	34	1307	69.18	89.18	card	AP009048:2165013-2166417	baeS	Multi-Drug Resistance	BaeS is a sensor kinase in the BaeSR regulatory system. While it phosphorylates BaeR to increase its activity BaeS is not necessary for overexpressed BaeR to confer resistance.
	1	1361	79.3	98.91	card	NC_002695:4903562-4904936	cpxA	Multi-Drug Resistance	CpxA is a membrane-localized sensor kinase that is activated by envelope stress. It starts a kinase cascade that activates CpxR which promotes efflux complex expression.
	1	699	80.31	99.71	card	CP015085.1:3009840-3010539	CpxR	Multi-Drug Resistance	The Escherichia coli CpxR/CpxA system responds to general periplasmic stress and has been used as a model two-component system for transcription regulation in bacteria. CpxR/CpxA system facilitates Salmonella and E. coli resistance to cationic antimicrobial peptides.The CpxR/CpxA system can activate transcription of marRAB operon thus facilitating multidrug-resistant regulator to enhance expressi…
	1	629	84.26	99.21	card	AP009048:4153664-4154297	CRP	Multi-Drug Resistance	CRP is a global regulator that represses MdtEF multidrug efflux pump expression.
	121	1046	73.65	78.88	card	AP009048:2810083-2811256	emrA	Multi-Drug Resistance	EmrA is a membrane fusion protein providing an efflux pathway with EmrB and TolC between the inner and outer membranes of E. coli a Gram-negative bacterium.
	7	1534	79.69	99.03	card	U00096:2812616-2814155	emrB	Multi-Drug Resistance	emrB is a translocase in the emrB -TolC efflux protein in E. coli. It recognizes substrates including carbonyl cyanide m-chlorophenylhydrazone (CCCP) nalidixic acid and thioloactomycin.
	32	1152	69.81	93.12	card	GG749185.1:116813-118004	emrD	Multi-Drug Resistance	EmrD is a multidrug transporter from the Major Facilitator Superfamily (MFS) primarily found in Escherichia coli. EmrD couples efflux of amphipathic compounds with proton import across the plasma membrane.
	1	503	76.63	94.35	card	NC_000913.3:2810770-2811301	emrR	Multi-Drug Resistance	EmrR is a negative regulator for the EmrAB-TolC multidrug efflux pump in E. coli. Mutations lead to EmrAB-TolC overexpression.
	1	1082	74.4	90.37	card	DQ679966:300-1494	acrA	Multi-Drug Resistance	AcrA is a subunit of the AcrAB-TolC multidrug efflux system that in E. cloacae.
	1	396	69.98	93.49	card	NC_002695:1737554-1737968	H-NS	Multi-Drug Resistance	H-NS is a histone-like protein involved in global gene regulation in Gram-negative bacteria. It is a repressor of the membrane fusion protein genes acrE mdtE and emrK as well as nearby genes of many RND-type multidrug exporters.
	256	399	75.51	34.7	card	NC_002695:1737554-1737968	H-NS	Multi-Drug Resistance	H-NS is a histone-like protein involved in global gene regulation in Gram-negative bacteria. It is a repressor of the membrane fusion protein genes acrE mdtE and emrK as well as nearby genes of many RND-type multidrug exporters.
	1	402	75.19	96.63	card	NC_002695:1737554-1737968	H-NS	Multi-Drug Resistance	H-NS is a histone-like protein involved in global gene regulation in Gram-negative bacteria. It is a repressor of the membrane fusion protein genes acrE mdtE and emrK as well as nearby genes of many RND-type multidrug exporters.
	31	685	73.11	96.02	card	NC_000913.3:721056-721734	kdpE	Multi-Drug Resistance	kdpE is a transcriptional activator that is part of the two-component system KdpD/KdpE that is studied for its regulatory role in potassium transport and has been identified as an adaptive regulator involved in the virulence and intracellular survival of pathogenic bacteria. kdpE regulates a range of virulence loci through direct promoter binding.
	163	1173	74.23	80.78	card	U00096:2154016-2155264	mdtA	Multi-Drug Resistance	MdtA is the membrane fusion protein of the multidrug efflux complex mdtABC.
	28	3074	77.14	97.31	card	U00096:2155263-2158386	mdtB	Multi-Drug Resistance	MdtB is a transporter that forms a heteromultimer complex with MdtC to form a multidrug transporter. MdtBC is part of the MdtABC-TolC efflux complex.
	1	3037	74.89	98.34	card	U00096:2158386-2161464	mdtC	Multi-Drug Resistance	MdtC is a transporter that forms a heteromultimer complex with MdtB to form a multidrug transporter. MdtBC is part of the MdtABC-TolC efflux complex. In the absence of MdtB MdtC can form a homomultimer complex that results in a functioning efflux complex with a narrower drug specificity. mdtC corresponds to 3 loci in Pseudomonas aeruginosa PAO1 (gene name: muxC/muxB) and 3 loci in Pseudomonas aer…
	1036	1574	73.01	17.09	card	AB015853:1331-4472	mexY	Multi-Drug Resistance	MexY is the RND-type membrane protein of the efflux complex MexXY-OprM.
	1	3404	77.23	98.38	card	NC_000913.3:1170518-1173965	mfd	Multi-Drug Resistance	mfd dissociates transcription elongation complexes blocked at nonpairing lesions and mediates recruitment of DNA repair proteins. The Mfd (mutation frequency decline) protein also known as transcription-repair coupling factor is responsible for ATP-dependent removal of stalled RNA polymerase from DNA lesions by inducing forward movement of the RNA polymerase and subsequent recruitment of nucleoti…
	1	1749	77.4	99.83	card	NC_000913.3:966621-968370	msbA	Multi-Drug Resistance	MsbA is a multidrug resistance transporter homolog from E. coli and belongs to a superfamily of transporters that contain an adenosine triphosphate (ATP) binding cassette (ABC) which is also called a nucleotide-binding domain (NBD). MsbA is a member of the MDR-ABC transporter group by sequence homology. MsbA transports lipid A a major component of the bacterial outer cell membrane and is the only…
	2662	3138	79.96	15.17	card	NC_002516.2:2850883-2854015	MuxB	Multi-Drug Resistance	MuxB is one of the two necessary RND components in the Pseudomonas aeruginosa efflux pump system MuxABC-OpmB.
	27	3051	68.41	95.37	card	NC_002516.2:2847776-2850887	MuxC	Multi-Drug Resistance	MuxC is one of the two necessary RND components of the MuxABC-OpmB efflux pumps system in Pseudomonas aeruginosa.
	34	1374	65.19	88.51	card	NC_002516.2:2846283-2847780	OpmB	Multi-Drug Resistance	OpmB is an outer membrane efflux protein in Pseudomonas aeruginosa that shows functional cooperation with MuxABC to form the efflux pump system MuxABC-OpmB.
	1	792	71.73	90.92	card	NC_000913.3:4634441-4635311	rob	Multi-Drug Resistance	rob is a positive regulator for the acrAB efflux genes and is structurally similar to SoxS and MarA.
	537	721	72.43	25.55	card	NC_003197:2039658-2040381	sdiA	Multi-Drug Resistance	SdiA is a cell division regulator that is also a positive regulator of AcrAB only when it's expressed from a plasmid. When the sdiA gene is on the chromosome it has no effect on expression of acrAB
	43	416	70.71	78.34	card	NC_002516.2:2503425-2503896	soxR	Multi-Drug Resistance	SoxR is a redox-sensitive transcriptional activator that induces expression of a small regulon that includes the RND efflux pump-encoding operon mexGHI-opmD. SoxR was shown to be activated by pyocyanin.
	1	1372	73.72	91.73	card	FJ768952:1-1489	tolC	Multi-Drug Resistance	TolC is a protein subunit of many multidrug efflux complexes in Gram negative bacteria. It is an outer membrane efflux protein and is constitutively open. Regulation of efflux activity is often at its periplasmic entrance by other components of the efflux complex.
	346	568	70.22	35.08	argannot	M58472:148-777	(Phe)CatB1	Phenicols	(Phe)CatB1
	3	1949	73.16	96.73	card	NC_002516.2:3982021-3984010	arnA	Polymyxin	arnA modifies lipid A with 4-amino-4-deoxy-L-arabinose (Ara4N) which allows gram-negative bacteria to resist the antimicrobial activity of cationic antimicrobial peptides and antibiotics such as polymyxin. arnA is found in E. coli and P. aeruginosa.
	706	1463	67.14	45.35	card	AP009048:4338625-4340269	PmrC	Polymyxin	PmrC mediates the modification of Lipid A by the addition of 4-amino-4-deoxy-L-arabinose (L-Ara4N) and phosphoethanolamine resulting in a less negative cell membrane and decreased binding of polymyxin B.
	119	1485	71.43	82.55	card	AP009048:4338625-4340269	PmrC	Polymyxin	PmrC mediates the modification of Lipid A by the addition of 4-amino-4-deoxy-L-arabinose (L-Ara4N) and phosphoethanolamine resulting in a less negative cell membrane and decreased binding of polymyxin B.
	25	954	72.59	95.67	card	U00096:2367071-2368040	pmrF	Polymyxin	PmrF is required for the synthesis and transfer of 4-amino-4-deoxy-L-arabinose (Ara4N) to Lipid A which allows gram-negative bacteria to resist the antimicrobial activity of cationic antimicrobial peptides and antibiotics such as polymyxin. pmrF corresponds to 1 locus in Pseudomonas aeruginosa PAO1 and 1 locus in Pseudomonas aeruginosa LESB58.
	1	1644	68.69	95.92	card	U46859:22366-24058	rosB	Polymyxin	rosB is part of an efflux pump/potassium antiporter system (RosAB) in Yersinia that confers resistance to cationic antimicrobial peptides such as polymyxin B.
	43	1122	72.04	91.41	argannot	EU370913:46652-47827	(Flq)OqxA	Quinolones	(Flq)OqxA
	1	3121	83.31	98.99	argannot	EU370913:47851-51003	(Flq)OqxBgb	Quinolones	(Flq)OqxBgb
	56	1364	72.19	90.6	card	CP014358.1:2161326-2162751	mdtK	Quinolones	A multidrug and toxic compound extrusions (MATE) transporter conferring resistance to norfloxacin doxorubicin and acriflavine.
	1	226	75.33	97.4	card	KU302801:102200-102431	vgaC	Streptogramin	vgaC is an efflux protein expressed in staphylococci that confers resistance to streptogramin A antibiotics and related compounds. It is associated with plasmid DNA.
Paracoccus_yeei_G1426	51	410	68.85	16.62	card	AF235050.4:38029-40141	parY	Aminocoumarin	point mutation on the Streptomyces rishiriensis parY resulting in aminocoumarin resistance
	67	447	69.35	17.71	card	AF235050.4:38029-40141	parY	Aminocoumarin	point mutation on the Streptomyces rishiriensis parY resulting in aminocoumarin resistance
	2	1176	74.27	97.4	card	X98831.1:362-1556	EF-Tu	Elfamycin	Sequence variants of Streptomyces cinnamoneus elongation factor Tu that confer resistance to elfamycin antibiotics.
	2	1176	74.36	97.4	card	X98831.1:362-1556	EF-Tu	Elfamycin	Sequence variants of Streptomyces cinnamoneus elongation factor Tu that confer resistance to elfamycin antibiotics.
	6	241	73.53	12.04	card	AY768532:1-1936	macB	Macrolides	MacB is an ATP-binding cassette (ABC) transporter that exports macrolides with 14- or 15- membered lactones. It forms an antibiotic efflux complex with MacA and TolC. macB corresponds to 1 locus in Pseudomonas aeruginosa PAO1 and 1 locus in Pseudomonas aeruginosa LESB58.
	700	968	70.74	13.85	card	AY768532:1-1936	macB	Macrolides	MacB is an ATP-binding cassette (ABC) transporter that exports macrolides with 14- or 15- membered lactones. It forms an antibiotic efflux complex with MacA and TolC. macB corresponds to 1 locus in Pseudomonas aeruginosa PAO1 and 1 locus in Pseudomonas aeruginosa LESB58.
	1018	1384	67.38	11.87	card	NC_002516.2:4904647-4907704	mexW	Multi-Drug Resistance	MexW is the RND-type membrane protein of the efflux complex MexVW-OprM.
	1	279	68.55	8.75	card	AB015853:1331-4472	mexY	Multi-Drug Resistance	MexY is the RND-type membrane protein of the efflux complex MexXY-OprM.
	2170	2339	74.27	4.9	card	NC_000913.3:1170518-1173965	mfd	Multi-Drug Resistance	mfd dissociates transcription elongation complexes blocked at nonpairing lesions and mediates recruitment of DNA repair proteins. The Mfd (mutation frequency decline) protein also known as transcription-repair coupling factor is responsible for ATP-dependent removal of stalled RNA polymerase from DNA lesions by inducing forward movement of the RNA polymerase and subsequent recruitment of nucleoti…
	105	683	68.01	47.3	card	AJ252200:82-1267	smeD	Multi-Drug Resistance	smeD is the membrane fusion protein of the smeDEF multidrug efflux complex in Stenotrophomonas maltophilia
	1	446	78.22	14.15	card	AJ252200:1279-4402	smeE	Multi-Drug Resistance	smeE is the RND protein of the efflux complex smeDEF in Stenotrophomonas maltophilia
	2203	3012	69.94	26.08	card	NC_002516.2:179522-182570	TriC	Multi-Drug Resistance	TriC is a resistance nodulation cell division (RND) transporter that is a part of TriABC-OpmH a triclosan-specific efflux protein.
	1447	1715	72.12	14.55	card	AF170880:1-1849	novA	Novobiocin	A type III ABC transporter identified on the novobiocin biosynthetic gene cluster involved in the transport and resistance of novobiocin.
	1329	1719	70.31	20.98	card	AF170880:1-1849	novA	Novobiocin	A type III ABC transporter identified on the novobiocin biosynthetic gene cluster involved in the transport and resistance of novobiocin.
	412	1166	66.75	63.87	card	U00096:2098447-2099614	pmrE	Polymyxin	PmrE is required for the synthesis and transfer of 4-amino-4-deoxy-L-arabinose (Ara4N) to Lipid A which allows gram-negative bacteria to resist the antimicrobial activity of cationic antimicrobial peptides and antibiotics such as polymyxin
	1017	1475	70.28	14.4	argannot	EU370913:47851-51003	(Flq)OqxBgb	Quinolones	(Flq)OqxBgb
Pedobacter quisquiliarum	2	1169	63.71	96.9	card	X98831.1:362-1556	EF-Tu	Elfamycin	Sequence variants of Streptomyces cinnamoneus elongation factor Tu that confer resistance to elfamycin antibiotics.
Planomicrobium glaciei G1601	285	527	69.55	40.91	card	KX531053.1:1-595	AAC(6')-34	Aminoglycosids	AAC(6')-34 is an aminoglycoside 6'-phosphotransferase found in Paenibacillus sp. LC231 a strain of Paenibacillus from Lechuguilla Cave NM USA. Confers resistance to aminoglycoside antibiotics. Described by Pawlowski et al. 2016.
	1060	1615	65.72	31.49	card	HQ652506.1:2100-3837	tetB(46)	Cyclines	tetB(46) is a subunit of tetAB(46) a heterodimeric ABC transporter that is required for conferring tetracycline resistance in Streptococcus australis isolated from the oral cavity.
	1248	1544	69	16.9	card	KX000272.1:1-1741	tetA(60)	Cyclines	tetA(60) is a subunit of tetAB(60) an ABC transporter that confers resistance to tetracycline and tigercycline identified by screening a human saliva metagenomic library in Escherichia coli which is required for resistance.
	7	1164	66.27	96.4	card	X98831.1:362-1556	EF-Tu	Elfamycin	Sequence variants of Streptomyces cinnamoneus elongation factor Tu that confer resistance to elfamycin antibiotics.
	51	1245	66.04	81.66	card	JYFL01000006.1:112070-113504	lmrB	Macrolides	lmrB is a chromosomally-encoded efflux pump that confers resistance to lincosamides in Bacillus subtilis
	40	1143	69.78	93.34	card	M33768:195-1365	bmr	Multi-Drug Resistance	bmr is an MFS antibiotic efflux pump that confers resistance to multiple drugs including acridine dyes fluoroquinolone antibiotics chloramphenicol and puromycin
	1344	1694	70.54	19.91	card	NC_002951:1987720-1989457	sav1866	Multi-Drug Resistance	Sav1866 is a multidrug efflux pump in the Gram-positive Staphylococcus aureus. It is a homolog of the human ABC transporter Mdr1 and pumps out toxic compounds including verapamil tetraphenylphosphorchloride and Hoechst 33342.
	334	693	67.04	13.52	card	KX531052.1:1-2656	rphB	Rifampicin	rphB is a rifampin phosphotransferase protein found in Paenibacillus sp. LC231 a strain of Paenibacillus isolated from Lechuguilla Cave NM USA. Confers resistance to rifamycin antibiotics specifically rifampin through rifampin inactivation. Described by Pawlowski et al. 2016.
	2319	2610	71.92	11	card	KX531052.1:1-2656	rphB	Rifampicin	rphB is a rifampin phosphotransferase protein found in Paenibacillus sp. LC231 a strain of Paenibacillus isolated from Lechuguilla Cave NM USA. Confers resistance to rifamycin antibiotics specifically rifampin through rifampin inactivation. Described by Pawlowski et al. 2016.
Sphingomonas paucimobilis G1448	1263	1589	70.57	15.2	card	AF235050.4:38029-40141	parY	Aminocoumarin	point mutation on the Streptomyces rishiriensis parY resulting in aminocoumarin resistance
	1240	1591	68.97	16.1	card	AF235050.4:38029-40141	parY	Aminocoumarin	point mutation on the Streptomyces rishiriensis parY resulting in aminocoumarin resistance
	145	397	71.09	56.69	argannot	M94066:1554-1994	(AGly)Aac6-Ic	Aminoglycosids	(AGly)Aac6-Ic
	40	309	72.59	13.55	argannot	X53401:349-2341	(Tet)otrA	Cyclines	(Tet)otrA
	2	1194	75.96	99.16	card	X98831.1:362-1556	EF-Tu	Elfamycin	Sequence variants of Streptomyces cinnamoneus elongation factor Tu that confer resistance to elfamycin antibiotics.
	905	1253	68.47	24.64	card	AB639410:1-1405	oprA	Multi-Drug Resistance	OprA is an outer membrane factor protein found in Pseudomonas aeruginosa. It is part of the MexXY-OprA complex.
	12	3099	69.86	96.28	card	L11616:1570-4711	MexB	Multi-Drug Resistance	MexB is the inner membrane multidrug exporter of the efflux complex MexAB-OprM.
	533	1086	67.08	47.35	card	NC_002516:472024-473176	MexA	Multi-Drug Resistance	MexA is the membrane fusion protein of the MexAB-OprM multidrug efflux complex.
	2430	3053	72.64	19.89	card	U57969:1486-4618	MexD	Multi-Drug Resistance	MexD is the multidrug inner membrane transporter of the MexCD-OprJ complex.
	830	1209	71.43	26.28	card	AB639410:1-1405	oprA	Multi-Drug Resistance	OprA is an outer membrane factor protein found in Pseudomonas aeruginosa. It is part of the MexXY-OprA complex.
	390	669	68.68	23.25	card	NC_006350.1:2150966-2152166	amrA	Multi-Drug Resistance	amrA is the efflux pump subunit of the AmrAB-OprM multidrug efflux complex. amrA corresponds to 1 locus in Pseudomonas aeruginosa PAO1 and 1 locus in Pseudomonas aeruginosa LESB58.
	1026	1491	77.25	14.83	card	AB015853:1331-4472	mexY	Multi-Drug Resistance	MexY is the RND-type membrane protein of the efflux complex MexXY-OprM.
	79	561	66.67	29.81	card	U00096:2812616-2814155	emrB	Multi-Drug Resistance	emrB is a translocase in the emrB -TolC efflux protein in E. coli. It recognizes substrates including carbonyl cyanide m-chlorophenylhydrazone (CCCP) nalidixic acid and thioloactomycin.
	1394	1730	66.47	17.74	card	AF170880:1-1849	novA	Novobiocin	A type III ABC transporter identified on the novobiocin biosynthetic gene cluster involved in the transport and resistance of novobiocin.
	1009	1443	73.58	13.57	argannot	EU370913:47851-51003	(Flq)OqxBgb	Quinolones	(Flq)OqxBgb
Staphylococcus saprophyticus G1441	3	795	79.37	98.75	argannot	HE579073:1778413-1779213	(AGly)APH-Stph	Aminoglycosids	(AGly)APH-Stph
	1456	1697	69.42	13.93	card	HQ652506.1:2100-3837	tetB(46)	Cyclines	tetB(46) is a subunit of tetAB(46) a heterodimeric ABC transporter that is required for conferring tetracycline resistance in Streptococcus australis isolated from the oral cavity.
	1	1356	77.92	99.78	card	AY661734.1:840-2196	mepA	Cyclines	MepA is an efflux protein regulated by MepR and part of the MepRAB cluster. Its presence in Staphylococcus aureus led to multidrug resistance while it has also been shown to decrease tigecycline susceptibility.
	1	414	73.91	98.34	card	HQ219726:386-806	FosB3	Fosfomycin	A thiol transferase that leads to the resistance of fosfomycin in Enterococcus faecium. Contrasting FosA FosB is dependent on the cofactor Magnesium (II) and uses either bacillithiol to open up the epoxide ring of fosfomycin.
	1	642	99.69	100	card	NZ_CP014057:2256546-2257188	fusD	Fusidic Acid	A specific fusidic acid resistance gene conferring intrinsic resistance in the bacteria Staphylococcus saprophyticus.
	1	1737	76.88	99.6	card	NC_002951:1987720-1989457	sav1866	Multi-Drug Resistance	Sav1866 is a multidrug efflux pump in the Gram-positive Staphylococcus aureus. It is a homolog of the human ABC transporter Mdr1 and pumps out toxic compounds including verapamil tetraphenylphosphorchloride and Hoechst 33342.
	1	327	85.02	73.48	card	NC_013450:694853-695297	mgrA	Multi-Drug Resistance	MgrA also known as NorR is a regulator for norA norB and tet38. It is a positive regulator for norA expression but is a direct repressor for norB and an indirect repressor of tet38.
	19	417	74.26	93.59	card	NC_009782:379935-380355	mepR	Multi-Drug Resistance	MepR is an upstream repressor of MepA in Staphylococcus aureus. It is part of the mepRAB operon.
	1	1055	72.97	88.13	argannot	BA000018:2517801-2518988	(Phe)Dha1	Phenicols	(Phe)Dha1
	28	1270	63.68	87.45	card	HE999704:2734781-2736182	norB	Quinolones	NorB is a multidrug efflux pump in Staphylococcus aureus that confers resistance to fluoroquinolones and other structurally unrelated antibiotics like tetracycline. It shares 30% similarity with NorB and is a structural homolog of Blt of Bacillus subtilis. It is regulated by mgrA also known as NorR.
	1	657	75.87	99.09	card	NC_009641:1461589-1462249	arlR	Quinolones	ArlR is a response regulator that binds to the norA promoter to activate expression. ArlR must first be phosphorylated by ArlS.
	1	1356	68.01	99.41	card	NC_007795:1360281-1361637	arlS	Quinolones	ArlS is a protein histidine kinase that phosphorylates ArlR a promoter for norA expression.
	2	1083	75.46	92.36	card	AY566250:392-1556	norA	Quinolones	NorA is a multidrug efflux pump in Staphylococcus aureus that confers resistance to fluoroquinolones and other structurally unrelated antibiotics like acriflavine. It shares 30% similarity with NorA and is a structural homolog of Bmr of Bacillus subtilis. It is regulated by arlRS and mgrA the latter also known as NorR.
	520	956	71.27	93.95	card	AF028811:1-463	dfrE	Sulfamids	dfrE is a chromosome-encoded dihydrofolate reductase found in Enterococcus faecalis
	1	465	73.61	95.47	argannot	Z48233:337-822	(Tmt)DfrC	Sulfamids	(Tmt)DfrC
Staphylococcus epidermidis	3	795	83.35	99	argannot	HE579073:1778413-1779213	(AGly)APH-Stph	Aminoglycosids	(AGly)APH-Stph
	1	846	99.17	100	argannot	AB245469:2235-3080	(Bla)BlaZ	Beta-lactams	(Bla)BlaZ
	147	1154	64.4	84.17	card	X98831.1:362-1556	EF-Tu	Elfamycin	Sequence variants of Streptomyces cinnamoneus elongation factor Tu that confer resistance to elfamycin antibiotics.
	1	444	88.29	99.78	card	NC_013450:694853-695297	mgrA	Multi-Drug Resistance	MgrA also known as NorR is a regulator for norA norB and tet38. It is a positive regulator for norA expression but is a direct repressor for norB and an indirect repressor of tet38.
	1	1737	77.32	99.94	card	NC_002951:1987720-1989457	sav1866	Multi-Drug Resistance	Sav1866 is a multidrug efflux pump in the Gram-positive Staphylococcus aureus. It is a homolog of the human ABC transporter Mdr1 and pumps out toxic compounds including verapamil tetraphenylphosphorchloride and Hoechst 33342.
	2217	2352	77.21	3.95	card	NC_000913.3:1170518-1173965	mfd	Multi-Drug Resistance	mfd dissociates transcription elongation complexes blocked at nonpairing lesions and mediates recruitment of DNA repair proteins. The Mfd (mutation frequency decline) protein also known as transcription-repair coupling factor is responsible for ATP-dependent removal of stalled RNA polymerase from DNA lesions by inducing forward movement of the RNA polymerase and subsequent recruitment of nucleoti…
	22	1176	74.2	96.97	argannot	BA000018:2517801-2518988	(Phe)Dha1	Phenicols	(Phe)Dha1
	17	417	70.97	95	argannot	AHLO01000073:63139-63558	(Fcyn)FosB	Quinolones	(Fcyn)FosB
	1	1164	97.59	99.91	card	AY566250:392-1556	norA	Quinolones	NorA is a multidrug efflux pump in Staphylococcus aureus that confers resistance to fluoroquinolones and other structurally unrelated antibiotics like acriflavine. It shares 30% similarity with NorA and is a structural homolog of Bmr of Bacillus subtilis. It is regulated by arlRS and mgrA the latter also known as NorR.
	26	1351	72.11	97.13	card	NC_007795:1360281-1361637	arlS	Quinolones	ArlS is a protein histidine kinase that phosphorylates ArlR a promoter for norA expression.
	1	660	75.49	99.09	card	NC_009641:1461589-1462249	arlR	Quinolones	ArlR is a response regulator that binds to the norA promoter to activate expression. ArlR must first be phosphorylated by ArlS.
	520	956	71.75	93.09	card	AF028811:1-463	dfrE	Sulfamids	dfrE is a chromosome-encoded dihydrofolate reductase found in Enterococcus faecalis
	1	486	96.91	100	argannot	Z48233:337-822	(Tmt)DfrC	Trimethoprim	(Tmt)DfrC
Staphylococcus capitis G1573	3	795	83.23	99	argannot	HE579073:1778413-1779213	(AGly)APH-Stph	Aminoglycosids	(AGly)APH-Stph
	1	846	98.58	100	argannot	AB245469:2235-3080	(Bla)BlaZ	Beta-lactams	(Bla)BlaZ
	141	1154	65	84.67	card	X98831.1:362-1556	EF-Tu	Elfamycin	Sequence variants of Streptomyces cinnamoneus elongation factor Tu that confer resistance to elfamycin antibiotics.
	7	417	73.67	96.91	card	HQ219726:386-806	FosB3	Fosfomycin	A thiol transferase that leads to the resistance of fosfomycin in Enterococcus faecium. Contrasting FosA FosB is dependent on the cofactor Magnesium (II) and uses either bacillithiol to open up the epoxide ring of fosfomycin.
	1308	1677	66.93	21	card	NC_002951:1987720-1989457	sav1866	Multi-Drug Resistance	Sav1866 is a multidrug efflux pump in the Gram-positive Staphylococcus aureus. It is a homolog of the human ABC transporter Mdr1 and pumps out toxic compounds including verapamil tetraphenylphosphorchloride and Hoechst 33342.
	1	441	87.98	99.1	card	NC_013450:694853-695297	mgrA	Multi-Drug Resistance	MgrA also known as NorR is a regulator for norA norB and tet38. It is a positive regulator for norA expression but is a direct repressor for norB and an indirect repressor of tet38.
	1	1737	78.53	99.94	card	NC_002951:1987720-1989457	sav1866	Multi-Drug Resistance	Sav1866 is a multidrug efflux pump in the Gram-positive Staphylococcus aureus. It is a homolog of the human ABC transporter Mdr1 and pumps out toxic compounds including verapamil tetraphenylphosphorchloride and Hoechst 33342.
	1	1171	72.08	97.05	argannot	BA000018:2517801-2518988	(Phe)Dha1	Phenicols	(Phe)Dha1
	1	1130	80.53	97	card	AY566250:392-1556	norA	Quinolones	NorA is a multidrug efflux pump in Staphylococcus aureus that confers resistance to fluoroquinolones and other structurally unrelated antibiotics like acriflavine. It shares 30% similarity with NorA and is a structural homolog of Bmr of Bacillus subtilis. It is regulated by arlRS and mgrA the latter also known as NorR.
	13	1349	70.81	97.57	card	NC_007795:1360281-1361637	arlS	Quinolones	ArlS is a protein histidine kinase that phosphorylates ArlR a promoter for norA expression.
	1	660	75.15	99.85	card	NC_009641:1461589-1462249	arlR	Quinolones	ArlR is a response regulator that binds to the norA promoter to activate expression. ArlR must first be phosphorylated by ArlS.
	150	518	68.45	25.96	card	HE999704:2734781-2736182	norB	Quinolones	NorB is a multidrug efflux pump in Staphylococcus aureus that confers resistance to fluoroquinolones and other structurally unrelated antibiotics like tetracycline. It shares 30% similarity with NorB and is a structural homolog of Blt of Bacillus subtilis. It is regulated by mgrA also known as NorR.
	1125	1254	76.92	9.27	card	HE999704:2734781-2736182	norB	Quinolones	NorB is a multidrug efflux pump in Staphylococcus aureus that confers resistance to fluoroquinolones and other structurally unrelated antibiotics like tetracycline. It shares 30% similarity with NorB and is a structural homolog of Blt of Bacillus subtilis. It is regulated by mgrA also known as NorR.
	508	804	73.06	64.15	card	AF028811:1-463	dfrE	Sulfamids	dfrE is a chromosome-encoded dihydrofolate reductase found in Enterococcus faecalis
	1	476	78.78	97.94	argannot	Z48233:337-822	(Tmt)DfrC	Trimethoprim	(Tmt)DfrC
Staphylococcus pasteuri G1440	3	795	83.86	99	argannot	HE579073:1778413-1779213	(AGly)APH-Stph	Aminoglycosids	(AGly)APH-Stph
	1	1351	78.5	99.12	card	AY661734.1:840-2196	mepA	Cyclines	MepA is an efflux protein regulated by MepR and part of the MepRAB cluster. Its presence in Staphylococcus aureus led to multidrug resistance while it has also been shown to decrease tigecycline susceptibility.
	141	1154	64.61	84.67	card	X98831.1:362-1556	EF-Tu	Elfamycin	Sequence variants of Streptomyces cinnamoneus elongation factor Tu that confer resistance to elfamycin antibiotics.
	1	1737	80.54	99.65	card	NC_002951:1987720-1989457	sav1866	Multi-Drug Resistance	Sav1866 is a multidrug efflux pump in the Gram-positive Staphylococcus aureus. It is a homolog of the human ABC transporter Mdr1 and pumps out toxic compounds including verapamil tetraphenylphosphorchloride and Hoechst 33342.
	1313	1682	67.83	21.12	card	NC_002951:1987720-1989457	sav1866	Multi-Drug Resistance	Sav1866 is a multidrug efflux pump in the Gram-positive Staphylococcus aureus. It is a homolog of the human ABC transporter Mdr1 and pumps out toxic compounds including verapamil tetraphenylphosphorchloride and Hoechst 33342.
	1	444	85.59	99.78	card	NC_013450:694853-695297	mgrA	Multi-Drug Resistance	MgrA also known as NorR is a regulator for norA norB and tet38. It is a positive regulator for norA expression but is a direct repressor for norB and an indirect repressor of tet38.
	1	1165	74.3	97.73	argannot	BA000018:2517801-2518988	(Phe)Dha1	Phenicols	(Phe)Dha1
	3	1359	71.17	99.04	card	NC_007795:1360281-1361637	arlS	Quinolones	ArlS is a protein histidine kinase that phosphorylates ArlR a promoter for norA expression.
	1	660	75.91	99.85	card	NC_009641:1461589-1462249	arlR	Quinolones	ArlR is a response regulator that binds to the norA promoter to activate expression. ArlR must first be phosphorylated by ArlS.
	56	527	65.27	33.24	card	HE999704:2734781-2736182	norB	Quinolones	NorB is a multidrug efflux pump in Staphylococcus aureus that confers resistance to fluoroquinolones and other structurally unrelated antibiotics like tetracycline. It shares 30% similarity with NorB and is a structural homolog of Blt of Bacillus subtilis. It is regulated by mgrA also known as NorR.
	1	1130	80	97	card	AY566250:392-1556	norA	Quinolones	NorA is a multidrug efflux pump in Staphylococcus aureus that confers resistance to fluoroquinolones and other structurally unrelated antibiotics like acriflavine. It shares 30% similarity with NorA and is a structural homolog of Bmr of Bacillus subtilis. It is regulated by arlRS and mgrA the latter also known as NorR.
	1	465	76.13	95.68	argannot	Z48233:337-822	(Tmt)DfrC	Trimethoprim	(Tmt)DfrC
